# Supplementary material for: Catalytic role of amines in activation of PhICl2 from a computational point of view
Source: Royal Society of Chemistry journal article supplement (doi:10.1039/d1cc03618a), 2021-01-01
Supplement: d1cc03618a1.pdf [file d1cc03618a1.pdf]

“Supporting Information for”

**Catalytic role of amines in activation of  $\text{PhICl}_2$ : Fundamental mechanistic features revealed by a DFT-based investigation**

Kaveh Farshadfar,<sup>a</sup> Alireza Ariafard,<sup>\*b</sup>

<sup>a</sup>*Department of Chemistry, Islamic Azad University, Central Tehran Branch, Poonak, Tehran 1469669191, Iran*

<sup>b</sup>*School of Natural Sciences (Chemistry), University of Tasmania, Private Bag 75, Hobart, TAS 7001, Australia*

**Contents:**

**Computational details** (page S12)

**Table S1.** Basis set effect on the DFT-proposed mechanism for pyridine-catalysed dichlorination of diazo compound **2**. (page S4)

**Figure S1.** Calculated mechanism for formation of activated complex **4**. (page S5)

**Fig. S2.** NCI analysis. (page S6)

**Additional References** (page S8)

**Table S2.** Total potential (E), enthalpy (H) and Gibbs free energies (G) of all structures optimized at the SMD/M06-2X/BS1 level of theory along with the total potential energies calculated by SMD/M06-2X/BS2//SMD/M06-2X/BS1, SMD/M06-2X/BS2//SMD/M06-2X/BS2, SMD/M06-2X/BS3//SMD/M06-2X/BS1 and SMD/M06-2X/BS3//SMD/M06-2X/BS2 and Cartesian coordinates for all of the calculated structures. (page S9)

## Computational details

Gaussian 16<sup>S1</sup> was used to fully optimize all the structures reported in this paper at the M06-2X level of theory.<sup>S2</sup> For all the calculations, solvent effects were considered using the SMD solvation model<sup>S3</sup> in dichloromethane. The SDD basis set<sup>S4</sup> with effective core potential (ECP) was chosen to describe iodine. The 6-31G(d) basis set<sup>S5</sup> was used for other atoms. This basis set combination will be referred to as BS1. Frequency calculations were carried out at the same level of theory as those for the structural optimization. Transition structures were located using the Berny algorithm. Intrinsic reaction coordinate (IRC) calculations were used to confirm the connectivity between transition structures and minima.<sup>S6</sup> To further refine the energies obtained from the SMD/M06-2X/SDD,6-31G(d) calculations, we carried out single-point energy calculations using the M06-2X functional method for all of the structures with a larger basis set (BS2). BS2 utilizes the def2-TZVP basis set<sup>S7</sup> on all atoms. Tight convergence criterion and ultrafine integral grid were also employed to increase the accuracy of the calculations. In this work, the free energy for each species in solution was calculated using the following formula:

$$G = E(\text{BS2}) + G(\text{BS1}) - E(\text{BS1}) + \Delta G^{1\text{atm} \rightarrow 1\text{M}} \quad (1)$$

where  $\Delta G^{1\text{atm} \rightarrow 1\text{M}} = 1.89$  kcal/mol is the free-energy change for compression of 1 mol of an ideal gas from 1 atm to the 1 M solution phase standard state.

The relative Gibbs energy of **TS**<sub>1'-4</sub> (Fig. S1) is estimated on the basis of the methodology proposed by Hall and Hartwig. In this protocol, for example, the Gibbs free energy barrier for a dissociation reaction such as  $A-B \rightarrow A + B$  is estimated as  $\Delta G^\ddagger \approx \Delta H = H_A + H_B - H_{A-B}$ .<sup>S8</sup>

To validate the accuracy of the SMD/M06-2X/def2-TZVP//SMD/M06-2X/SDD,6-31G(d) calculations in determining the relative energies of species, we optimized all structures related to the most favourable pathway for the pyridine-catalysed dichlorination reaction using the triple-zeta def2-TZVP

Ahlrich's basis set and the corresponding ECP for the iodine atom. In addition, the single point calculations using the quadruple-*zeta* def2-QZVP Ahlrich's basis set and the corresponding ECP for the iodine atom were carried out to refine the energy values for the structures optimized by SMD/M06-2X/SDD,6-31G(d) and SMD/M06-2X/def2-TZVP; the Ahlrich basis sets have been benchmarked for non-covalent interactions (NCI) involving chlorine and reported suitable for mechanistic analysis of such systems;<sup>59</sup> the NCI analysis for some selected structures confirms the presence of van der Waals interactions in these systems (Figure S2). These additional results demonstrate that basis set dependence is insignificant (Table S1). For example, using SMD/M06-2X/def2-TZVP//SMD/M06-2X/SDD,6-31G(d), the relative free energies of **TS**<sub>1-4</sub>, **4**, **11**, and **TS**<sub>11</sub> are 22.8, 11.1, 23.8, and 23.9 kcal/mol, respectively. Using SMD/M06-2X/def2-QZVP//SMD/M06-2X/def2-TZVP, the relative free energies are 24.5, 11.8, 22.3, and 23.2 kcal/mol, respectively. It follows from these results that the methodology used for studying the title reaction is adequately reliable.

**Table S1.** Basis set effect on the DFT-proposed mechanism for pyridine-catalysed dichlorination of diazo compound **2**.

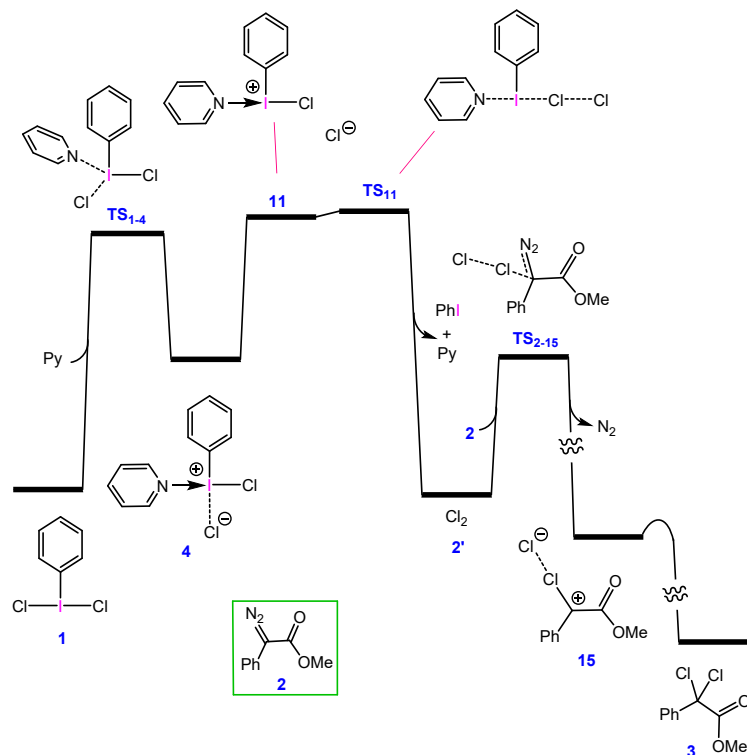

| method/basis set                              | TS <sub>1-4</sub> | 4             | 11             | TS <sub>11</sub> | 2'            | TS <sub>2-15</sub> | 15               | 3                |
|-----------------------------------------------|-------------------|---------------|----------------|------------------|---------------|--------------------|------------------|------------------|
| SMD/M06-2X/def2-TZVP//SMD/M06-2X/6-31G(d),SDD | 22.8<br>(13.5)    | 11.1<br>(0.6) | 23.8<br>(14.7) | 23.9<br>(14.8)   | -0.2<br>(8.6) | 11.5<br>(12.0)     | -27.9<br>(-16.6) | -57.0<br>(-48.9) |
| SMD/M06-2X/def2-QZVP//SMD/M06-2X/6-31G(d),SDD | 22.9<br>(13.6)    | 10.8<br>(0.3) | 21.1<br>(12.0) | 21.7<br>(12.6)   | 0.4<br>(9.2)  | 12.6<br>(13.1)     | -28.3<br>(-17.0) | -55.3<br>(-47.2) |
| SMD/M06-2X/def2-TZVP//SMD/M06-2X/def2-TZVP    | 24.5<br>(13.9)    | 12.1<br>(1.2) | 24.9<br>(15.0) | 25.5<br>(15.2)   | 2.8<br>(10.5) | 15.3<br>(14.3)     | -25.4<br>(-15.2) | -54.0<br>(-47.0) |
| SMD/M06-2X/def2-QZVP//SMD/M06-2X/def2-TZVP    | 24.5<br>(13.9)    | 11.8<br>(0.9) | 22.3<br>(12.4) | 23.2<br>(12.9)   | 3.5<br>(11.2) | 16.5<br>(15.5)     | -25.8<br>(-15.6) | -52.2<br>(-45.2) |

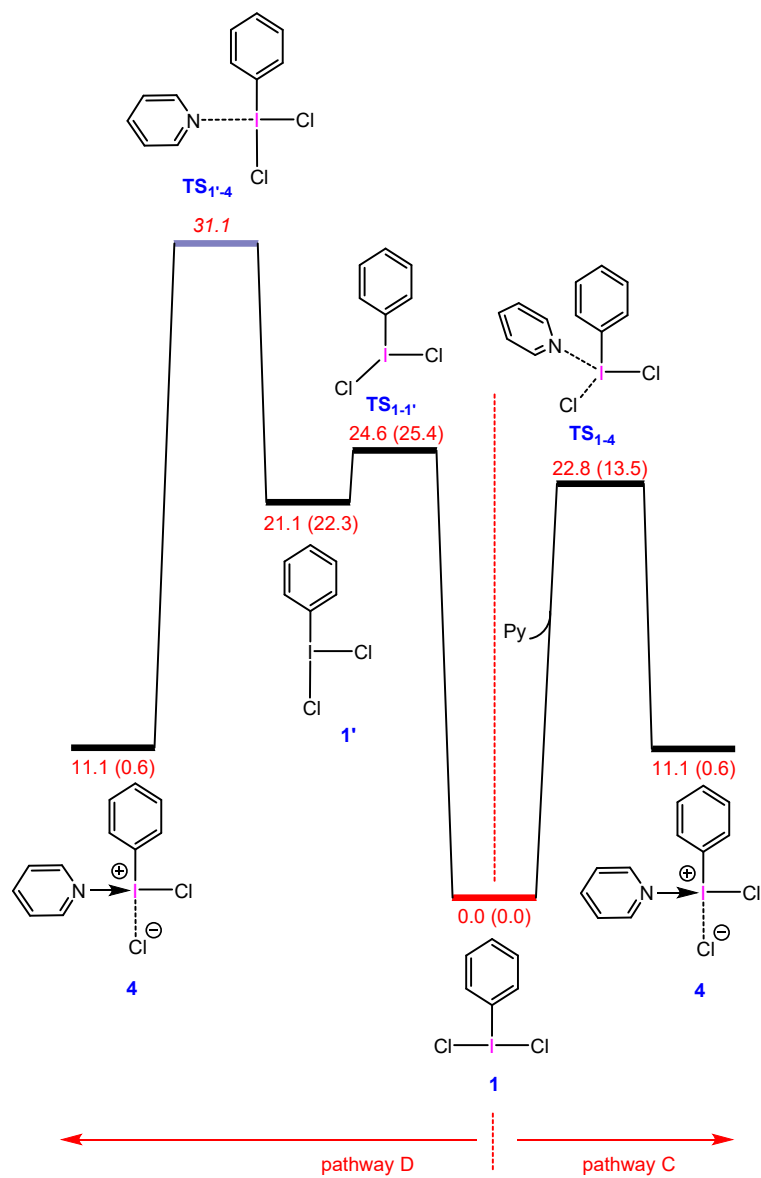

**Fig. S1.** Calculated mechanism for formation of activated complex **4**.

**NCI analysis.** To evaluate whether a weak noncovalent interaction exists between two chlorine atoms in our systems, we performed NCI analysis for structures **15**, **TS<sub>2-15</sub>**, and **TS<sub>11</sub>** using the Multiwfn 3.7 package.<sup>S10</sup> This method is used for distinguishing hydrogen bonds, van der Waals interactions and repulsive steric clashes<sup>S11</sup> and has been reported as a powerful tool for assessing the characteristic of halogen bonds.<sup>S12</sup> Plot of the reduced density gradient versus  $\text{sign}(\lambda_2)\rho$  for these selected structures are shown in Figure S2. An attractive interaction is identified between two chlorine atoms in **15**, confirmed by one spike with a negative  $\lambda_2$ . This result indicates the presence of a halogen bond between the two chlorine atoms in this molecule. For structure **TS<sub>2-15</sub>**, no noncovalent interaction between two chlorines is detected by means of the NCI analysis. This is because, in this transition structure, a significant covalent bonding interaction still exists between the two chlorine atoms, a claim that finds support from Wiberg bond index (WBI) analysis showing a WBI value of 0.637 for this bond (Fig. S2a). In contrast, due to the early character of transition structure **TS<sub>11</sub>**, there is a negligible covalent bonding between two chlorines in this structure, supported by a small WBI value of 0.02 (Fig. S2c). As a result, we identified an attractive noncovalent weak interaction midway between the two chlorine atoms in **TS<sub>11</sub>** within the NCI framework.

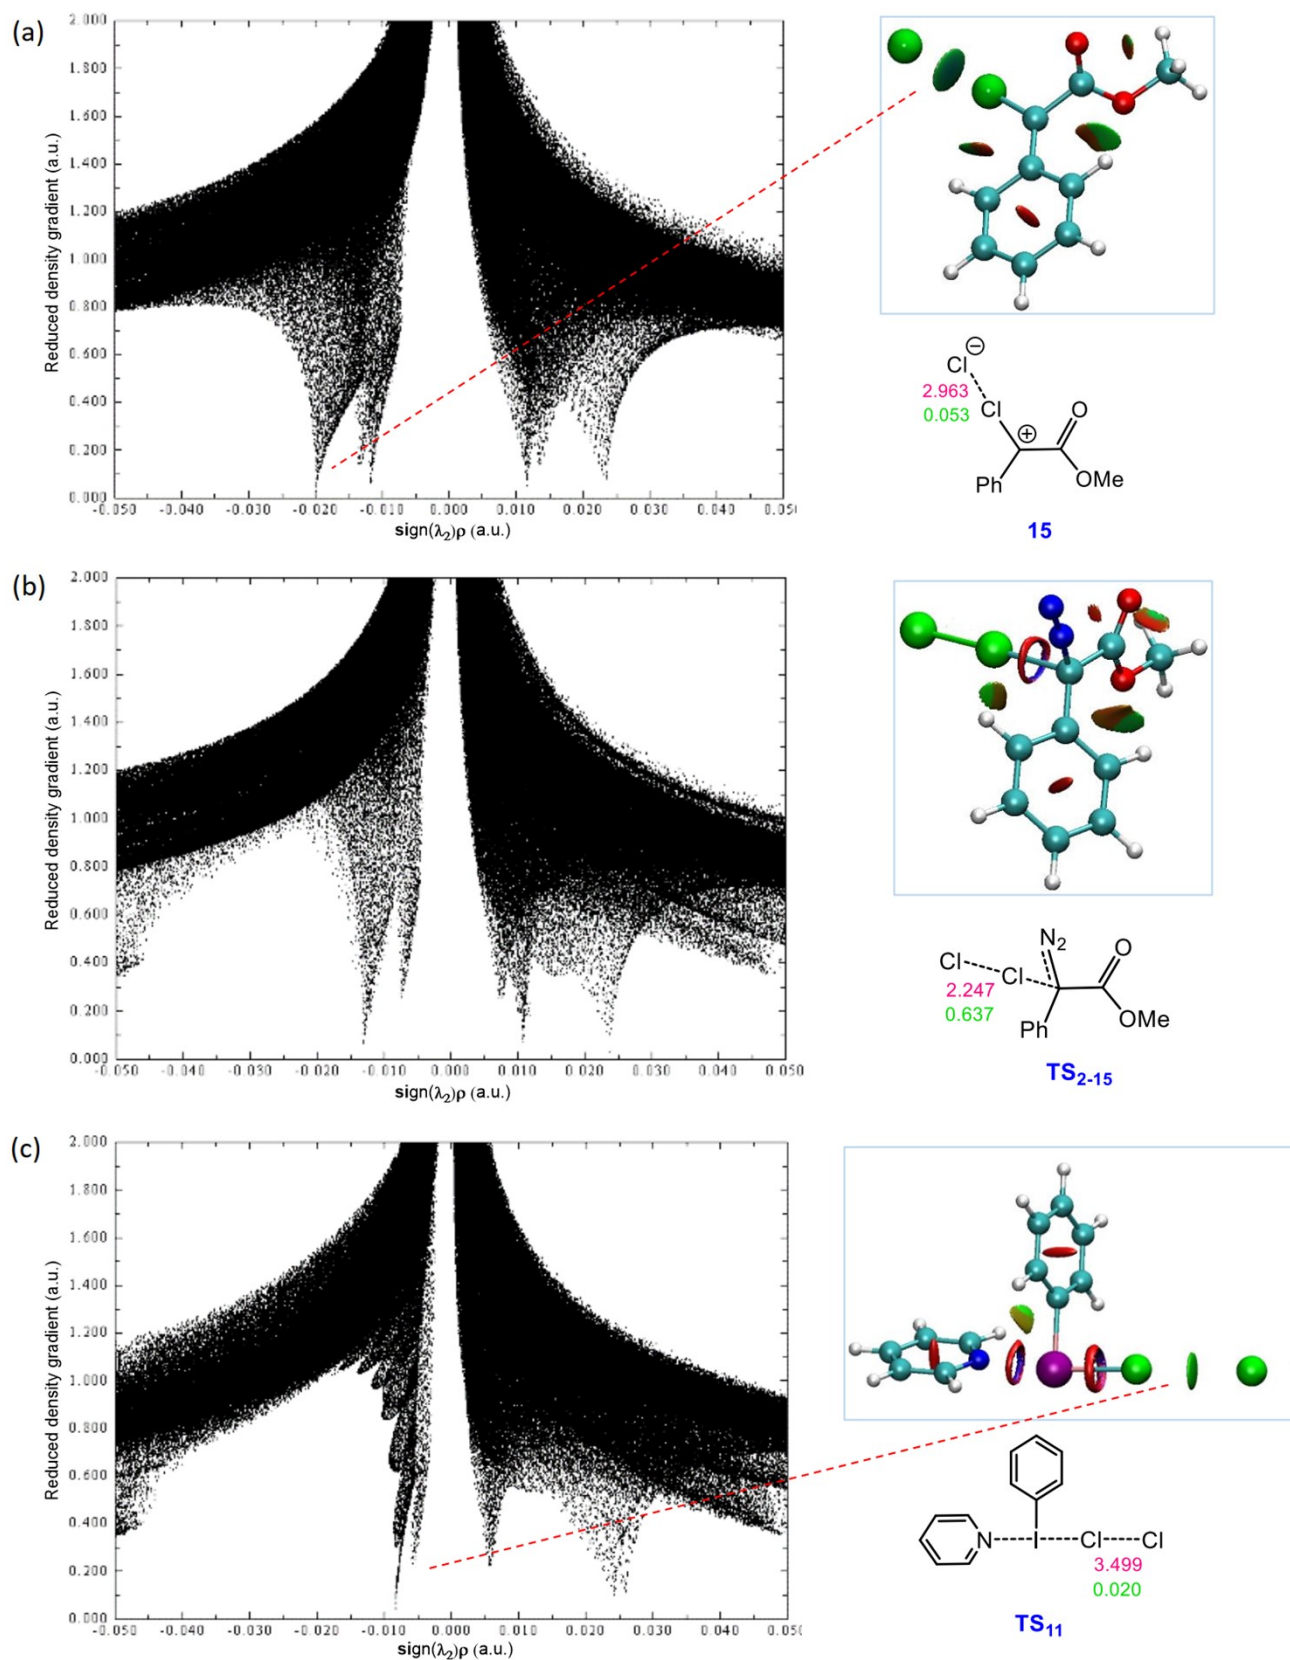

**Fig. S2.** NCI analysis for **TS<sub>11</sub>**, **TS<sub>2-15</sub>** and **15** calculated at the SMD/M06-2X/def2-TZVP//SMD/M06-2X/6-31G(d),SDD level of theory in dichloromethane. The Cl-Cl distances (Å) and the WBI values between two chlorine atoms are annotated in pink and green, respectively.

## Additional References

- [S1] M. J. Frisch, G. W. Trucks, H. B. Schlegel, G. E. Scuseria, M. A. Robb, J. R. Cheeseman, G. Scalmani, V. Barone, G. A. Petersson, H. Nakatsuji, X. Li, M. Caricato, A. V. Marenich, J. Bloino, B. G. Janesko, R. Gomperts, B. Mennucci, H. P. Hratchian, J. V. Ortiz, A. F. Izmaylov, J. L. Sonnenberg, D. Williams-Young, F. Ding, F. Lipparini, F. Egidi, J. Goings, B. Peng, A. Petrone, T. Henderson, D. Ranasinghe, V. G. Zakrzewski, J. Gao, N. Rega, G. Zheng, W. Liang, M. Hada, M. Ehara, K. Toyota, R. Fukuda, J. Hasegawa, M. Ishida, T. Nakajima, Y. Honda, O. Kitao, H. Nakai, T. Vreven, K. Throssell, J. A. Montgomery, J. E. Peralta, F. Ogliaro, M. J. Bearpark, J. J. Heyd, E. N. Brothers, K. N. Kudin, V. N. Staroverov, T. A. Keith, R. Kobayashi, J. Normand, K. Raghavachari, A. P. Rendell, J. C. Burant, S. S. Iyengar, J. Tomasi, M. Cossi, J. M. Millam, M. Klene, C. Adamo, R. Cammi, J. W. Ochterski, R. L. Martin, K. Morokuma, O. Farkas, J. B. Foresman and D. J. Fox, Gaussian 16, Revision A.03, Gaussian, Inc., Wallingford CT, 2016.
- [S2] (a) Y. Zhao and D. G. Truhlar, *Theor. Chem. Acc.*, 2008, **120**, 215 (b) Y. Zhao and D. G. Truhlar, *Acc. Chem. Res.* **2008**, *41*, 157.
- [S3] A. V. Marenich, C. T. Cramer, and D. G. Truhlar, *J. Phys. Chem. B*, 2009, **113**, 6378.
- [S4] (a) M. Dolg, U. Wedig, H. Stoll and H. Preuss, *J. Chem. Phys.*, 1987, **86**, 866; (b) A. Bergner, M. Dolg, W. Küchle, H. Stoll and H. Preuß, *Mol. Phys.*, 1993, **80**, 6, 1431.
- [S5] P. C. Hariharan and J. A. Pople, *Theor. Chem. Acta.*, 1973, **28**, 213.
- [S6] (a) K. Fukui, *J. Chem. Phys.*, 1970, **74**, 4161; (b) K. Fukui, *Acc. Chem. Res.*, 1981, **14**, 363.
- [S7] F. Weigend, F. Furche and R. Ahlrichs, *J. Chem. Phys.*, 2003, **119**, 12753.
- [S8] J. F. Hartwig, K. S. Cook, M. Hapke, C. D. Incarvito, Y. Fan, C. E. Webster and M. B. Hall, *J. Am. Chem. Soc.* **2005**, *127*, 2538.
- [S9] (a) A. Bauzá, D. Quiñonero, P. M. Deyà and A. Frontera, *J. Phys. Chem. A*, **2013**, *117*, 2651; (b) A. Siiskonen and A. Priimagi, *J. Mol. Model.*, **2017**, *23*, 50.
- [S10] T. Lu and F. Chen, *J. Comput. Chem.*, **2012**, *33*, 580.
- [S11] (a) E. R. Johnson, S. Keinan, P. Mori-Sanchez, J. Contreras-García, A. J. Cohen and W. J. Yang, *Am. Chem. Soc.* **2010**, *132*, 6498; (b) J. Contreras-García, E. R. Johnson, S. Keinan, R. Chaudret, J.-P. Piquemal, D. N. Beratan and W. Yang, *J. Chem. Theory Comput.* **2011**, *7*, 625.
- [S12] (a) B. Pinter, N. Nagels, W. A. Herrebout and F. De Proft, *Chem.-Eur. J.* **2013**, *19*, 519; (b) S. Kozuch and J. M. L. Martin, *J. Chem. Theory Comput.* **2013**, *9*, 1918.



**Table S2.** Total potential (E), enthalpy (H) and Gibbs free energies (G) of all structures optimized at the SMD/M06-2X/BS1 level of theory along with the total potential energies calculated by SMD/M06-2X/BS2//SMD/M06-2X/BS1, SMD/M06-2X/BS2//SMD/M06-2X/BS2, SMD/M06-2X/BS3//SMD/M06-2X/BS1 and SMD/M06-2X/BS3//SMD/M06-2X/BS2 and Cartesian coordinates for all of the calculated structures.

BS1 = 6-31G(d),SDD

BS2 = def2-TZVP

BS3 = def2-QZVP

#### 4

E (SMD/M06-2X/BS1) = -1411.38013035 au

G (SMD/M06-2X/BS1) = -1411.241629 au

E (SMD/M06-2X/BS2//SMD/M06-2X/BS1) = -1697.91806273 au

|    |             |             |             |
|----|-------------|-------------|-------------|
| C  | -3.60000100 | 2.32142500  | -0.19192800 |
| C  | -3.34983400 | 1.65418500  | 1.00567100  |
| C  | -2.32964100 | 0.70695700  | 1.08033300  |
| C  | -1.58315500 | 0.45289800  | -0.06433700 |
| C  | -1.81404100 | 1.10290300  | -1.27017900 |
| C  | -2.83625800 | 2.04857100  | -1.32545500 |
| H  | -4.39631300 | 3.05714300  | -0.24305700 |
| H  | -3.94574000 | 1.86820600  | 1.88701200  |
| H  | -2.12689900 | 0.18065900  | 2.00781600  |
| H  | -1.21729900 | 0.87920900  | -2.14867300 |
| H  | -3.03555400 | 2.56601700  | -2.25835700 |
| I  | -0.00508100 | -0.98535200 | 0.03062500  |
| Cl | -1.82112400 | -2.85812500 | -0.07841000 |
| C  | 3.02668100  | 2.99478000  | 0.06652600  |
| C  | 2.03234400  | 2.87719700  | 1.03462100  |
| C  | 1.19697600  | 1.77253500  | 1.00341000  |
| C  | 2.29861300  | 0.91867400  | -0.87398300 |
| C  | 3.16113000  | 2.00388100  | -0.90081300 |
| H  | 3.69265600  | 3.85133000  | 0.06834400  |
| H  | 1.89962400  | 3.62419000  | 1.80806900  |
| H  | 0.39996400  | 1.62579800  | 1.72525200  |
| H  | 2.36581800  | 0.10039800  | -1.58147500 |
| H  | 3.92310200  | 2.05785400  | -1.66925300 |
| N  | 1.34261400  | 0.83063300  | 0.06054300  |
| Cl | 2.76787400  | -2.23161700 | 0.13571500  |

#### 9

E (SMD/M06-2X/BS1) = -1310.26890063 au

G (SMD/M06-2X/BS1) = -1310.066569 au

E (SMD/M06-2X/BS2//SMD/M06-2X/BS1) = -1596.91565895 au

|   |             |            |            |
|---|-------------|------------|------------|
| C | -3.77179400 | 1.65706500 | 0.67685400 |
|---|-------------|------------|------------|

|    |             |             |             |
|----|-------------|-------------|-------------|
| C  | -3.10302600 | 1.70535000  | -0.54561400 |
| C  | -2.08309700 | 0.79883400  | -0.82641700 |
| C  | -1.77125600 | -0.13271800 | 0.15677700  |
| C  | -2.42222500 | -0.22014300 | 1.38240500  |
| C  | -3.43726900 | 0.70117600  | 1.63437700  |
| H  | -4.56427400 | 2.36867000  | 0.88347400  |
| H  | -3.36988900 | 2.44811000  | -1.28997900 |
| H  | -1.55260100 | 0.82392100  | -1.77211900 |
| H  | -2.15438100 | -0.97519600 | 2.11447000  |
| H  | -3.96540500 | 0.66216100  | 2.58109800  |
| I  | -0.18363100 | -1.49816200 | -0.22391200 |
| Cl | -1.80693600 | -3.17315900 | -1.34959500 |
| C  | 0.15091800  | 3.82106500  | -0.15656300 |
| C  | 0.45234100  | 2.68034400  | 0.58240200  |
| C  | 1.03139100  | 1.57398600  | -0.04687300 |
| C  | 1.29810800  | 1.61400400  | -1.42174600 |
| C  | 0.99959200  | 2.76118600  | -2.14728700 |
| C  | 0.42238400  | 3.86543600  | -1.52054000 |
| H  | -0.29808800 | 4.67337400  | 0.34248300  |
| H  | 0.23192400  | 2.67264600  | 1.64594000  |
| H  | 1.72725000  | 0.75366000  | -1.92238100 |
| H  | 1.21100200  | 2.78567600  | -3.21131200 |
| H  | 0.18459500  | 4.75477400  | -2.09492800 |
| C  | 1.30640500  | 0.30900300  | 0.70639200  |
| N  | 0.85659400  | 0.36028500  | 2.02179600  |
| N  | 0.44384900  | 0.35192200  | 3.04689100  |
| C  | 2.67797400  | -0.34831000 | 0.75926100  |
| O  | 3.07200300  | -0.92603700 | 1.74123000  |
| O  | 3.30424100  | -0.22978600 | -0.39083900 |
| C  | 4.60659300  | -0.85039700 | -0.45198800 |
| H  | 5.26296100  | -0.39903800 | 0.29315400  |
| H  | 4.51293600  | -1.92275500 | -0.27371100 |
| H  | 4.96902200  | -0.65385800 | -1.45831700 |

## 15

E (SMD/M06-2X/BS1) = -1418.27635651 au

G (SMD/M06-2X/BS1) = -1418.166438 au

E (SMD/M06-2X/BS2//SMD/M06-2X/BS1) = -1418.55456444 au

|   |            |             |             |
|---|------------|-------------|-------------|
| C | 3.43499200 | -0.99913700 | 0.16807300  |
| C | 2.37514700 | -0.12092300 | 0.19853700  |
| C | 1.04215100 | -0.61303300 | 0.04038600  |
| C | 0.82206800 | -2.01165500 | -0.14797300 |
| C | 1.89500800 | -2.87056900 | -0.18446700 |
| C | 3.19527000 | -2.36598300 | -0.02573200 |

|    |             |             |             |
|----|-------------|-------------|-------------|
| H  | 4.44843600  | -0.63636700 | 0.29280300  |
| H  | 2.55507500  | 0.93775100  | 0.35134800  |
| H  | -0.18735400 | -2.39011000 | -0.26757100 |
| H  | 1.73885700  | -3.93266600 | -0.33292600 |
| H  | 4.03607600  | -3.05264800 | -0.05232000 |
| C  | -0.02438700 | 0.28458300  | 0.09260000  |
| C  | 0.17484600  | 1.77566500  | 0.30473000  |
| O  | -0.22024900 | 2.31760400  | 1.30116100  |
| O  | 0.78261700  | 2.32517900  | -0.72556600 |
| C  | 0.96925700  | 3.75599000  | -0.63975000 |
| H  | -0.00022500 | 4.24620300  | -0.54028300 |
| H  | 1.60254400  | 3.99285600  | 0.21665400  |
| H  | 1.45371200  | 4.03707600  | -1.57185500 |
| Cl | -1.63437100 | -0.17202900 | 0.01360600  |
| Cl | -4.45105200 | -1.08408800 | -0.10413800 |

Cl<sup>-</sup>

E (SMD/M06-2X/BS1) = -460.313950773 au

G (SMD/M06-2X/BS1) = -460.328974 au

E (SMD/M06-2X/BS2//SMD/M06-2X/BS1) = -460.355413773 au

|    |            |            |            |
|----|------------|------------|------------|
| Cl | 0.00000000 | 0.00000000 | 0.00000000 |
|----|------------|------------|------------|

Cl<sub>2</sub>

E (SMD/M06-2X/BS1) = -920.277078700 au

G (SMD/M06-2X/BS1) = -920.297643 au

E (SMD/M06-2X/BS2//SMD/M06-2X/BS1) = -920.363316311 au

|    |            |            |            |
|----|------------|------------|------------|
| Cl | 0.00000000 | 0.00000000 | 1.00755000 |
|----|------------|------------|------------|

|    |            |            |             |
|----|------------|------------|-------------|
| Cl | 0.00000000 | 0.00000000 | -1.00755000 |
|----|------------|------------|-------------|

**2**

E (SMD/M06-2X/BS1) = -607.433529208 au

G (SMD/M06-2X/BS1) = -607.311778 au

E (SMD/M06-2X/BS2//SMD/M06-2X/BS1) = -607.681406007 au

|   |             |            |            |
|---|-------------|------------|------------|
| C | -3.17006600 | 0.49571200 | 0.43586900 |
|---|-------------|------------|------------|

|   |             |            |            |
|---|-------------|------------|------------|
| C | -1.86210600 | 0.96698000 | 0.40720600 |
|---|-------------|------------|------------|

|   |             |            |             |
|---|-------------|------------|-------------|
| C | -0.81599500 | 0.14600400 | -0.03947900 |
|---|-------------|------------|-------------|

|   |             |             |             |
|---|-------------|-------------|-------------|
| C | -1.11275000 | -1.15887300 | -0.45762400 |
|---|-------------|-------------|-------------|

|   |             |             |             |
|---|-------------|-------------|-------------|
| C | -2.42264600 | -1.62701900 | -0.41188400 |
|---|-------------|-------------|-------------|

|   |             |             |            |
|---|-------------|-------------|------------|
| C | -3.45758600 | -0.80624200 | 0.03130400 |
|---|-------------|-------------|------------|

|   |             |            |            |
|---|-------------|------------|------------|
| H | -3.96419900 | 1.14815900 | 0.78574200 |
|---|-------------|------------|------------|

|   |             |            |            |
|---|-------------|------------|------------|
| H | -1.65379000 | 1.97980400 | 0.74241500 |
|---|-------------|------------|------------|

|   |             |             |             |
|---|-------------|-------------|-------------|
| H | -0.32121600 | -1.80345700 | -0.81916300 |
|---|-------------|-------------|-------------|

|   |             |             |             |
|---|-------------|-------------|-------------|
| H | -2.63371800 | -2.64145300 | -0.73656700 |
|---|-------------|-------------|-------------|

|   |             |             |            |
|---|-------------|-------------|------------|
| H | -4.47741000 | -1.17653400 | 0.06005600 |
|---|-------------|-------------|------------|

|   |            |             |             |
|---|------------|-------------|-------------|
| C | 0.56147000 | 0.67365300  | -0.09028400 |
| N | 0.71303400 | 1.97918500  | -0.17820500 |
| N | 0.84635300 | 3.09434300  | -0.25295000 |
| C | 1.85576000 | -0.00936000 | 0.00239100  |
| O | 2.92500600 | 0.56307200  | -0.06918200 |
| O | 1.72406800 | -1.32609700 | 0.18920600  |
| C | 2.95592600 | -2.04807300 | 0.29724100  |
| H | 3.54661300 | -1.93239300 | -0.61386300 |
| H | 3.53149200 | -1.69134600 | 1.15385600  |
| H | 2.67187600 | -3.08995900 | 0.43697200  |

N<sub>2</sub>

E (SMD/M06-2X/BS1) = -109.480264686 au

G (SMD/M06-2X/BS1) = -109.492893 au

E (SMD/M06-2X/BS2//SMD/M06-2X/BS1) = -109.530305870 au

|   |            |            |             |
|---|------------|------------|-------------|
| N | 0.00000000 | 0.00000000 | 0.54903100  |
| N | 0.00000000 | 0.00000000 | -0.54903100 |

PhI

E (SMD/M06-2X/BS1) = -242.911245883 au

G (SMD/M06-2X/BS1) = -242.851785 au

E (SMD/M06-2X/BS2//SMD/M06-2X/BS1) = -529.265362662 au

|   |             |             |             |
|---|-------------|-------------|-------------|
| C | -3.34874900 | 0.00000000  | 0.00012100  |
| C | -2.65078100 | -1.20554100 | 0.00000900  |
| C | -1.25616200 | -1.21410700 | -0.00011500 |
| C | -0.57676100 | -0.00001700 | -0.00018100 |
| C | -1.25614400 | 1.21411600  | -0.00013400 |
| C | -2.65071500 | 1.20557100  | 0.00002600  |
| H | -4.43416000 | 0.00002600  | 0.00031800  |
| H | -3.18820000 | -2.14887400 | 0.00008800  |
| H | -0.71298800 | -2.15289900 | -0.00019000 |
| H | -0.71291900 | 2.15287700  | -0.00026800 |
| H | -3.18814400 | 2.14889200  | 0.00017300  |
| I | 1.55985400  | -0.00000300 | 0.00002900  |

**1**

E (SMD/M06-2X/BS1) = -1163.19091141 au

G (SMD/M06-2X/BS1) = -1163.134871 au

E (SMD/M06-2X/BS2//SMD/M06-2X/BS1) = -1449.64242301 au

|   |            |             |             |
|---|------------|-------------|-------------|
| C | 3.71221400 | -0.08680500 | -0.00032600 |
| C | 3.02572900 | 0.10330600  | 1.19747100  |
| C | 1.63230000 | 0.12539300  | 1.21446600  |
| C | 0.97672500 | -0.04510400 | 0.00318800  |
| C | 1.62403500 | -0.24080000 | -1.20831700 |

|    |             |             |             |
|----|-------------|-------------|-------------|
| C  | 3.01743800  | -0.26081500 | -1.19558000 |
| H  | 4.79734000  | -0.09789500 | -0.00256900 |
| H  | 3.56928600  | 0.23729300  | 2.12686400  |
| H  | 1.08494100  | 0.27581500  | 2.13831000  |
| H  | 1.07014200  | -0.36960300 | -2.13152400 |
| H  | 3.55379200  | -0.40803100 | -2.12716300 |
| I  | -1.15397200 | 0.03262800  | -0.00275200 |
| Cl | -0.96458600 | 2.61863300  | -0.08891700 |
| Cl | -1.20280300 | -2.55615600 | 0.09341800  |

### 10

E (SMD/M06-2X/BS1) = -951.036335640 au

G (SMD/M06-2X/BS1) = -950.895114 au

E (SMD/M06-2X/BS2//SMD/M06-2X/BS1) = -1237.53577238 au

|    |             |             |             |
|----|-------------|-------------|-------------|
| C  | -1.57521000 | 3.54891900  | -0.09700600 |
| C  | -1.61236300 | 2.85684300  | 1.11171400  |
| C  | -1.29524500 | 1.50018800  | 1.15527200  |
| C  | -0.95030100 | 0.88804400  | -0.04095900 |
| C  | -0.90674800 | 1.53947900  | -1.26550700 |
| C  | -1.22481300 | 2.89669800  | -1.27781000 |
| H  | -1.82448200 | 4.60466900  | -0.11974300 |
| H  | -1.88859400 | 3.36637200  | 2.02890800  |
| H  | -1.32447500 | 0.94739600  | 2.08793700  |
| H  | -0.64158000 | 1.01776500  | -2.17843900 |
| H  | -1.20182200 | 3.43799600  | -2.21771900 |
| I  | -0.45023900 | -1.18633000 | 0.01439800  |
| Cl | -2.95852600 | -1.73313200 | -0.01559600 |
| C  | 4.30262200  | 0.42980500  | 0.06829700  |
| C  | 3.55838300  | 0.40834800  | 1.24501100  |
| C  | 2.24932600  | -0.04319900 | 1.20038800  |
| C  | 2.40541300  | -0.44193200 | -1.09888600 |
| C  | 3.71898800  | -0.00059800 | -1.12015500 |
| H  | 5.32931300  | 0.77978400  | 0.07782200  |
| H  | 3.97750100  | 0.73508800  | 2.18912500  |
| H  | 1.61675400  | -0.08037100 | 2.08133100  |
| H  | 1.89245400  | -0.78952700 | -1.98960100 |
| H  | 4.26567400  | 0.00271500  | -2.05551000 |
| N  | 1.70522000  | -0.45410000 | 0.04510800  |

### 3

E (SMD/M06-2X/BS1) = -1418.32847218 au

G (SMD/M06-2X/BS1) = -1418.213551 au

E (SMD/M06-2X/BS2//SMD/M06-2X/BS1) = -1418.60603972 au

|   |             |            |            |
|---|-------------|------------|------------|
| C | -3.24353000 | 0.97070800 | 0.34046100 |
|---|-------------|------------|------------|

|    |             |             |             |
|----|-------------|-------------|-------------|
| C  | -1.85977300 | 1.15341300  | 0.30929900  |
| C  | -1.02496400 | 0.09091300  | -0.02321700 |
| C  | -1.58471600 | -1.15756900 | -0.32589900 |
| C  | -2.96014800 | -1.33480700 | -0.29172200 |
| C  | -3.79662500 | -0.26794000 | 0.04202400  |
| H  | -3.88295600 | 1.80829700  | 0.60002000  |
| H  | -1.45211700 | 2.12857800  | 0.54596600  |
| H  | -0.94224900 | -1.99348100 | -0.58651900 |
| H  | -3.38050200 | -2.30780800 | -0.52490200 |
| H  | -4.87285800 | -0.40691400 | 0.06762100  |
| C  | 0.48786000  | 0.21340200  | -0.10161400 |
| C  | 1.18746100  | -0.78632500 | 0.86824500  |
| O  | 0.52254400  | -1.37998900 | 1.67543800  |
| O  | 2.50344800  | -0.95007700 | 0.86253300  |
| C  | 3.47638300  | -0.39825200 | -0.03734600 |
| H  | 3.54824500  | -1.02430600 | -0.92741300 |
| H  | 3.25925400  | 0.63234000  | -0.31211100 |
| H  | 4.41387900  | -0.43548900 | 0.51717800  |
| Cl | 1.06917700  | 1.84669700  | 0.37287600  |
| Cl | 0.99021600  | -0.12092900 | -1.80611100 |

#### Pyridine

E (SMD/M06-2X/BS1) = -248.179243021 au

G (SMD/M06-2X/BS1) = -248.116564 au

E (SMD/M06-2X/BS2//SMD/M06-2X/BS1) = -248.276593636 au

|   |             |             |             |
|---|-------------|-------------|-------------|
| C | -0.00003400 | -1.38136900 | -0.00000100 |
| C | 1.19669500  | -0.67106800 | 0.00000900  |
| C | 1.14146700  | 0.72049800  | -0.00002000 |
| C | -1.14142900 | 0.72055300  | 0.00002300  |
| C | -1.19672600 | -0.67101900 | -0.00000900 |
| H | -0.00005100 | -2.46726400 | 0.00000000  |
| H | 2.15483900  | -1.17941100 | 0.00003100  |
| H | 2.05908900  | 1.30472500  | 0.00000400  |
| H | -2.05902800 | 1.30481800  | -0.00000600 |
| H | -2.15490000 | -1.17930500 | -0.00003200 |
| N | 0.00003100  | 1.41583800  | -0.00000200 |

#### 12

E (SMD/M06-2X/BS1) = -708.129304288 au

G (SMD/M06-2X/BS1) = -708.065589 au

E (SMD/M06-2X/BS2//SMD/M06-2X/BS1) = -708.263298038 au

|    |            |             |             |
|----|------------|-------------|-------------|
| Cl | 0.00000000 | 2.18195700  | 0.00000000  |
| C  | 0.00000000 | -2.24167200 | 0.00000000  |
| C  | 0.00000000 | -1.54218100 | -1.20465800 |
| C  | 0.00000000 | -0.16237600 | -1.19068300 |
| C  | 0.00000000 | -0.16237600 | 1.19068300  |

|   |            |             |             |
|---|------------|-------------|-------------|
| C | 0.00000000 | -1.54218100 | 1.20465800  |
| H | 0.00000000 | -3.32616600 | 0.00000000  |
| H | 0.00000000 | -2.04975400 | -2.16127800 |
| H | 0.00000000 | 0.45570100  | -2.08015700 |
| H | 0.00000000 | 0.45570100  | 2.08015700  |
| H | 0.00000000 | -2.04975400 | 2.16127800  |
| N | 0.00000000 | 0.47510500  | 0.00000000  |

**TS<sub>8</sub>**

E (SMD/M06-2X/BS1) = -1770.59754446 au

G (SMD/M06-2X/BS1) = -1770.398880 au

E (SMD/M06-2X/BS2//SMD/M06-2X/BS1) = -2057.28050587 au

|    |             |             |             |
|----|-------------|-------------|-------------|
| C  | -3.56548700 | 2.78452300  | 0.92896800  |
| C  | -2.75438000 | 2.86667100  | -0.20021300 |
| C  | -1.99860800 | 1.76514100  | -0.60199700 |
| C  | -2.07322800 | 0.60507200  | 0.15872300  |
| C  | -2.88388300 | 0.49254200  | 1.28260400  |
| C  | -3.63651900 | 1.60092300  | 1.66394200  |
| H  | -4.15052900 | 3.64540600  | 1.23621300  |
| H  | -2.70895300 | 3.78432500  | -0.77761500 |
| H  | -1.36951700 | 1.81706100  | -1.48449900 |
| H  | -2.92171100 | -0.42985500 | 1.85333700  |
| H  | -4.27448800 | 1.53740400  | 2.53943700  |
| I  | -0.83763100 | -1.05340500 | -0.38931300 |
| Cl | -3.15510500 | -2.21093400 | -1.26988900 |
| C  | 3.32870300  | 2.82917700  | -0.61860400 |
| C  | 2.66370700  | 1.89368700  | 0.15779500  |
| C  | 1.69307200  | 1.05615100  | -0.42242600 |
| C  | 1.40932600  | 1.17047700  | -1.79034900 |
| C  | 2.10105900  | 2.09285600  | -2.56758500 |
| C  | 3.05257700  | 2.92500800  | -1.98407800 |
| H  | 4.06691000  | 3.47969500  | -0.16203100 |
| H  | 2.88284000  | 1.81808100  | 1.21856200  |
| H  | 0.67674400  | 0.52210600  | -2.25765900 |
| H  | 1.88998000  | 2.16117900  | -3.62919800 |
| H  | 3.58176200  | 3.65185400  | -2.59218300 |
| C  | 1.00450600  | 0.06004500  | 0.41450500  |
| N  | 0.25343900  | 1.06518000  | 1.67024200  |
| N  | -0.15555100 | 1.77040200  | 2.40537700  |
| C  | 1.77145400  | -0.82608300 | 1.41924800  |
| O  | 1.18545200  | -1.43190500 | 2.27993300  |
| O  | 3.07153600  | -0.75286200 | 1.24988400  |
| C  | 3.83440100  | -1.68855200 | 2.03110100  |
| H  | 3.67408300  | -1.50801200 | 3.09547700  |
| H  | 3.53029500  | -2.70369500 | 1.76738100  |
| H  | 4.87317700  | -1.51320900 | 1.75959200  |
| Cl | 1.75642900  | -2.52839800 | -0.96134200 |

**TS<sub>1-4</sub>**

E (SMD/M06-2X/BS1) = -1411.35808386 au

G (SMD/M06-2X/BS1) = -1411.221549 au

E (SMD/M06-2X/BS2//SMD/M06-2X/BS1) = -1697.89756019 au

|    |             |             |             |
|----|-------------|-------------|-------------|
| C  | 1.08770600  | 3.82177200  | 0.36706900  |
| C  | 0.69782500  | 3.24148300  | -0.84178800 |
| C  | 0.62566500  | 1.85737100  | -0.96518200 |
| C  | 0.97153700  | 1.09152300  | 0.14223600  |
| C  | 1.36559800  | 1.63467900  | 1.35690500  |
| C  | 1.41882100  | 3.02611600  | 1.46001700  |
| H  | 1.13117700  | 4.90253000  | 0.45524100  |
| H  | 0.44191000  | 3.86628600  | -1.69129900 |
| H  | 0.30397100  | 1.39172400  | -1.89083600 |
| H  | 1.62220000  | 1.00167300  | 2.19962100  |
| H  | 1.71972500  | 3.47901400  | 2.39903200  |
| I  | 0.88896900  | -1.03579300 | -0.00438300 |
| Cl | 3.23622700  | -0.94764900 | -1.08834900 |
| Cl | -0.95745000 | -2.65595600 | 1.36789500  |
| C  | -2.22450200 | 1.01146700  | 0.46909600  |
| C  | -3.55461600 | 1.39633300  | 0.32762900  |
| C  | -4.36783200 | 0.66947700  | -0.53660900 |
| C  | -3.82581600 | -0.41590800 | -1.21935000 |
| C  | -2.48961700 | -0.73560500 | -1.00258500 |
| N  | -1.70872200 | -0.03277300 | -0.18067100 |
| H  | -5.40890700 | 0.94383600  | -0.67539200 |
| H  | -1.54832100 | 1.55883000  | 1.12328900  |
| H  | -3.93532700 | 2.24663200  | 0.88244900  |
| H  | -4.42203500 | -1.00921800 | -1.90359900 |
| H  | -2.02650700 | -1.58583700 | -1.49840100 |

**TS<sub>1-12</sub>**

E (SMD/M06-2X/BS1) = -1411.35469813 au

G (SMD/M06-2X/BS1) = -1411.220007 au

E (SMD/M06-2X/BS2//SMD/M06-2X/BS1) = -1697.88769919 au

|   |             |             |             |
|---|-------------|-------------|-------------|
| C | -2.27141200 | 3.61087700  | -0.05927700 |
| C | -1.56163000 | 3.05076200  | -1.11883400 |
| C | -1.26980100 | 1.68700400  | -1.12798000 |
| C | -1.70025000 | 0.91900000  | -0.05355700 |
| C | -2.41205300 | 1.44783200  | 1.01475500  |
| C | -2.69636600 | 2.81243400  | 1.00090300  |
| H | -2.49786500 | 4.67228800  | -0.06128000 |
| H | -1.23578800 | 3.66917500  | -1.94912800 |
| H | -0.72471000 | 1.24232200  | -1.95386800 |
| H | -2.74909900 | 0.81649400  | 1.82891900  |
| H | -3.25361700 | 3.24643100  | 1.82490200  |
| I | -1.24552000 | -1.16428800 | -0.03892500 |



|    |             |             |             |
|----|-------------|-------------|-------------|
| Cl | 1.37425400  | -0.65989900 | 0.01442000  |
| Cl | -4.38360000 | -1.47591100 | 0.02228000  |
| C  | 6.07124800  | 0.37412600  | 0.12253300  |
| C  | 5.31717400  | 0.41034400  | 1.29267400  |
| C  | 3.96480100  | 0.10181800  | 1.22480300  |
| C  | 4.10178100  | -0.26599100 | -1.07698400 |
| C  | 5.45824600  | 0.03165600  | -1.08012500 |
| H  | 7.12968300  | 0.61127200  | 0.14769400  |
| H  | 5.76044600  | 0.67190700  | 2.24647400  |
| H  | 3.31447400  | 0.10959000  | 2.09381700  |
| H  | 3.55759800  | -0.54065400 | -1.97509400 |
| H  | 6.01368100  | -0.00666900 | -2.00994000 |
| N  | 3.40660500  | -0.22218200 | 0.05902200  |

#### TS<sub>4</sub>

E (SMD/M06-2X/BS1) = -1411.30401568 au

G (SMD/M06-2X/BS1) = -1411.172353 au

E (SMD/M06-2X/BS2//SMD/M06-2X/BS1) = -1697.82957875 au

|    |             |             |             |
|----|-------------|-------------|-------------|
| C  | 0.88954300  | 3.89050300  | -0.17163100 |
| C  | 0.90810800  | 3.07987100  | -1.30735100 |
| C  | 0.42188300  | 1.77739700  | -1.24752200 |
| C  | -0.07128600 | 1.30896400  | -0.02986500 |
| C  | -0.10544600 | 2.10381200  | 1.11554100  |
| C  | 0.38205500  | 3.40625000  | 1.03306000  |
| H  | 1.26987900  | 4.90546300  | -0.22737300 |
| H  | 1.30020800  | 3.46104000  | -2.24462700 |
| H  | 0.43410300  | 1.13799400  | -2.12366800 |
| H  | -0.49728800 | 1.71534000  | 2.04945200  |
| H  | 0.36504300  | 4.03933400  | 1.91429000  |
| I  | -0.78781900 | -0.65751900 | 0.08660300  |
| Cl | -3.89661900 | -1.95755300 | 0.02199500  |
| Cl | -3.42423000 | 0.61967400  | -0.17549700 |
| C  | 2.65816200  | -2.19050800 | -0.27354700 |
| C  | 4.02615300  | -2.43987500 | -0.33704600 |
| C  | 4.90345600  | -1.41579300 | 0.00809700  |
| C  | 4.38237800  | -0.18661400 | 0.40173000  |
| C  | 2.99885100  | -0.03178800 | 0.43241000  |
| N  | 2.15659700  | -1.01207600 | 0.10170000  |
| H  | 5.97688300  | -1.57345500 | -0.02919400 |
| H  | 1.93676400  | -2.96154700 | -0.53483000 |
| H  | 4.38781100  | -3.41298600 | -0.65071700 |
| H  | 5.02815700  | 0.63900100  | 0.67994600  |
| H  | 2.54799300  | 0.91349400  | 0.73115100  |

#### 11

E (SMD/M06-2X/BS1) = -1411.35374169 au

G (SMD/M06-2X/BS1) = -1411.217499 au

E (SMD/M06-2X/BS2//SMD/M06-2X/BS1) = -1697.89566043 au

|    |             |             |             |
|----|-------------|-------------|-------------|
| C  | -0.91364900 | 3.96440200  | 0.23944100  |
| C  | -0.85485300 | 3.18622400  | 1.39388300  |
| C  | -0.55774400 | 1.82647400  | 1.31308300  |
| C  | -0.33286600 | 1.30002600  | 0.04924000  |
| C  | -0.37932600 | 2.04072200  | -1.12270700 |
| C  | -0.67722000 | 3.39776900  | -1.01163600 |
| H  | -1.14050800 | 5.02272800  | 0.31492500  |
| H  | -1.03327700 | 3.63321600  | 2.36620600  |
| H  | -0.50109500 | 1.21008600  | 2.20349700  |
| H  | -0.18105300 | 1.58762700  | -2.08831700 |
| H  | -0.71746900 | 4.00700000  | -1.90848100 |
| I  | 0.12271600  | -0.77406600 | -0.10774600 |
| Cl | 7.21389400  | -0.78932200 | 0.12360800  |
| Cl | 2.60666100  | -0.18233600 | -0.16188400 |
| C  | -2.70600800 | -1.56812200 | 1.06913400  |
| C  | -4.07575000 | -1.76591600 | 1.14721300  |
| C  | -4.86607100 | -1.42596300 | 0.05289700  |
| C  | -4.26765700 | -0.89867600 | -1.08837700 |
| C  | -2.89255500 | -0.72587000 | -1.10342100 |
| N  | -2.14880900 | -1.05770700 | -0.03811200 |
| H  | -5.94056700 | -1.57116200 | 0.08877700  |
| H  | -2.03433900 | -1.81026400 | 1.88631300  |
| H  | -4.5052800  | -2.17776200 | 2.05263300  |
| H  | -4.84944200 | -0.62412600 | -1.96014400 |
| H  | -2.36628000 | -0.31615100 | -1.95986800 |

### TS<sub>11</sub>

E (SMD/M06-2X/BS1) = -1411.35221931 au

G (SMD/M06-2X/BS1) = -1411.215977 au

E (SMD/M06-2X/BS2//SMD/M06-2X/BS1) = -1697.89545304 au

|    |             |             |             |
|----|-------------|-------------|-------------|
| C  | -0.14420300 | 3.90811900  | 0.25891400  |
| C  | -0.46933600 | 3.13066100  | 1.36893800  |
| C  | -0.39826600 | 1.74050400  | 1.29951900  |
| C  | -0.00208800 | 1.18120600  | 0.09288500  |
| C  | 0.32961600  | 1.92034400  | -1.03396200 |
| C  | 0.25349900  | 3.30897900  | -0.93449100 |
| H  | -0.19724300 | 4.98976000  | 0.32630600  |
| H  | -0.77185100 | 3.60039000  | 2.29903400  |
| H  | -0.63976700 | 1.12350900  | 2.15824600  |
| H  | 0.64486900  | 1.44071200  | -1.95437400 |
| H  | 0.50915200  | 3.91665600  | -1.79613500 |
| I  | 0.11298700  | -0.94572900 | -0.03582200 |
| Cl | 6.12562200  | -0.61788100 | -0.04460800 |
| Cl | 2.63230400  | -0.80459500 | 0.04011800  |
| C  | -2.93995300 | -1.42912500 | 0.85912600  |
| C  | -4.32736500 | -1.41018500 | 0.85030600  |

|   |             |             |             |
|---|-------------|-------------|-------------|
| C | -4.98098700 | -0.72085800 | -0.16695800 |
| C | -4.23135700 | -0.07193100 | -1.14498500 |
| C | -2.84783500 | -0.13282200 | -1.07457700 |
| N | -2.23471100 | -0.79776900 | -0.08706300 |
| H | -6.06507600 | -0.68906900 | -0.19776400 |
| H | -2.37288600 | -1.94705200 | 1.62646500  |
| H | -4.87521900 | -1.92586800 | 1.63013700  |
| H | -4.70371400 | 0.47416900  | -1.95295300 |
| H | -2.20871100 | 0.35751900  | -1.80291400 |

### TS'<sub>1</sub>

E (SMD/M06-2X/BS1) = -1163.13091651 au

G (SMD/M06-2X/BS1) = -1163.077818 au

E (SMD/M06-2X/BS2//SMD/M06-2X/BS1) = -1449.58326090 au

|    |             |             |             |
|----|-------------|-------------|-------------|
| C  | 4.23869600  | 0.90879000  | 0.00451700  |
| C  | 3.57322900  | 0.74430000  | -1.21043700 |
| C  | 2.27877800  | 0.23516300  | -1.23659500 |
| C  | 1.69716900  | -0.09496400 | -0.01484700 |
| C  | 2.33013000  | 0.05701000  | 1.21646800  |
| C  | 3.62436800  | 0.56765900  | 1.20968700  |
| H  | 5.24741100  | 1.30865000  | 0.01211700  |
| H  | 4.05787800  | 1.01337000  | -2.14283600 |
| H  | 1.74407600  | 0.10440300  | -2.17057100 |
| H  | 1.83418600  | -0.20993000 | 2.14297400  |
| H  | 4.14897500  | 0.69993600  | 2.14981100  |
| I  | -0.25226000 | -0.89442800 | -0.03136700 |
| Cl | -4.97993500 | 0.59460900  | -0.02554400 |
| Cl | -1.49753300 | 1.16894900  | 0.13484900  |

### TS<sub>9</sub>

E (SMD/M06-2X/BS1) = -1770.58948271 au

G (SMD/M06-2X/BS1) = -1770.391076 au

E (SMD/M06-2X/BS2//SMD/M06-2X/BS1) = -2057.26612764 au

|    |             |             |             |
|----|-------------|-------------|-------------|
| C  | 3.31263600  | 2.63780100  | -0.46997600 |
| C  | 3.05172800  | 2.08774500  | 0.78473700  |
| C  | 2.33831400  | 0.89665600  | 0.89788900  |
| C  | 1.89909100  | 0.28194700  | -0.26937000 |
| C  | 2.15344000  | 0.80484600  | -1.53595800 |
| C  | 2.86790900  | 1.99794400  | -1.62556500 |
| H  | 3.86908900  | 3.56648900  | -0.54702300 |
| H  | 3.40131300  | 2.58557500  | 1.68378500  |
| H  | 2.13187300  | 0.46122000  | 1.86951100  |
| H  | 1.80764600  | 0.29499900  | -2.42968700 |
| H  | 3.07766100  | 2.42167200  | -2.60248900 |
| I  | 0.74771500  | -1.48606400 | -0.12136900 |
| Cl | 3.38481200  | -2.95411800 | 0.53395200  |
| C  | -0.10350400 | 3.49065100  | 0.24734700  |

|    |             |             |             |
|----|-------------|-------------|-------------|
| C  | -0.63784600 | 2.39610000  | -0.41639100 |
| C  | -1.11712800 | 1.29877800  | 0.31759200  |
| C  | -1.03863200 | 1.30200500  | 1.71920600  |
| C  | -0.51247800 | 2.41095000  | 2.36849600  |
| C  | -0.04620600 | 3.50532000  | 1.64068300  |
| H  | 0.26275500  | 4.33515200  | -0.32665700 |
| H  | -0.69831200 | 2.41340500  | -1.50082100 |
| H  | -1.38208100 | 0.45117300  | 2.29262900  |
| H  | -0.45985900 | 2.41350500  | 3.45212600  |
| H  | 0.36702700  | 4.36541300  | 2.15769100  |
| C  | -1.69588600 | 0.15377000  | -0.38490600 |
| N  | -1.41960500 | 0.05512900  | -1.75975500 |
| N  | -1.24427700 | 0.01031100  | -2.84888000 |
| C  | -2.39791800 | -1.11641000 | 0.06547200  |
| O  | -2.57751100 | -2.03142100 | -0.69633400 |
| O  | -2.74985500 | -1.04353300 | 1.32594100  |
| C  | -3.45327300 | -2.19894300 | 1.83106200  |
| H  | -4.37099900 | -2.34511200 | 1.25964300  |
| H  | -2.81334500 | -3.07983100 | 1.75771100  |
| H  | -3.67464000 | -1.96536400 | 2.86985000  |
| Cl | -3.83201200 | 1.02998000  | -0.96348500 |

## 8

E (SMD/M06-2X/BS1) = -1770.61749782 au

G (SMD/M06-2X/BS1) = -1770.418175 au

E (SMD/M06-2X/BS2//SMD/M06-2X/BS1) = -2057.30067252 au

|    |             |             |             |
|----|-------------|-------------|-------------|
| C  | -3.47028500 | 2.15427600  | 0.69446900  |
| C  | -2.59774600 | 1.94507300  | 1.76102800  |
| C  | -1.27497400 | 1.57633600  | 1.52223800  |
| C  | -0.86254800 | 1.42526500  | 0.20291900  |
| C  | -1.70953500 | 1.64723400  | -0.87881600 |
| C  | -3.02848000 | 2.01202500  | -0.62063600 |
| H  | -4.50042400 | 2.43575800  | 0.88876100  |
| H  | -2.94240000 | 2.06845400  | 2.78267500  |
| H  | -0.58712100 | 1.41048900  | 2.34427500  |
| H  | -1.35427300 | 1.53238300  | -1.89743700 |
| H  | -3.70827200 | 2.18260700  | -1.44932600 |
| I  | 1.13356300  | 0.80077800  | -0.19378400 |
| Cl | 1.86538300  | 3.33847600  | -0.32479700 |
| C  | -2.58453100 | -1.44851500 | -2.51920900 |
| C  | -1.31206400 | -1.47494100 | -1.96335900 |
| C  | -1.15209700 | -1.55516200 | -0.57317300 |
| C  | -2.27858400 | -1.59386200 | 0.25443300  |
| C  | -3.54963700 | -1.55085700 | -0.31353300 |
| C  | -3.70883900 | -1.48030600 | -1.69476400 |
| H  | -2.69529800 | -1.39150200 | -3.59709300 |
| H  | -0.44348600 | -1.42029300 | -2.61604900 |

|    |             |             |             |
|----|-------------|-------------|-------------|
| H  | -2.17472400 | -1.64728900 | 1.33044900  |
| H  | -4.41898900 | -1.57467600 | 0.33573000  |
| H  | -4.70313300 | -1.44884000 | -2.12847100 |
| C  | 0.23405100  | -1.53366600 | -0.00719100 |
| N  | 1.11464500  | -2.27314200 | -0.80489900 |
| N  | 1.88057600  | -2.77750200 | -1.41901800 |
| C  | 0.55926200  | -1.92553400 | 1.42551400  |
| O  | 1.40889700  | -2.73048400 | 1.70713000  |
| O  | -0.16682300 | -1.22191100 | 2.27485400  |
| C  | 0.10070600  | -1.46592600 | 3.67064100  |
| H  | -0.06105700 | -2.51990800 | 3.90095000  |
| H  | 1.12877600  | -1.18209000 | 3.90134300  |
| H  | -0.60562600 | -0.83903500 | 4.21102100  |
| Cl | 3.77555000  | -0.60096200 | -0.83920900 |

### TS<sub>10</sub>

E (SMD/M06-2X/BS1) = -1558.45500031 au

G (SMD/M06-2X/BS1) = -1558.174387 au

E (SMD/M06-2X/BS2//SMD/M06-2X/BS1) = -1845.19134875 au

|   |             |             |             |
|---|-------------|-------------|-------------|
| C | 4.96129000  | -2.91124000 | -0.79654000 |
| C | 4.20617900  | -2.08224500 | 0.02326900  |
| C | 4.24031300  | -0.69358300 | -0.16108100 |
| C | 5.03579600  | -0.14379800 | -1.17209000 |
| C | 5.77779000  | -0.98476600 | -1.99679500 |
| C | 5.74545700  | -2.36473000 | -1.81238700 |
| H | 4.93098100  | -3.98541200 | -0.64592400 |
| H | 3.58549500  | -2.51484100 | 0.80417000  |
| H | 5.07796900  | 0.92922500  | -1.31423900 |
| H | 6.39092800  | -0.55343600 | -2.78144600 |
| H | 6.33012900  | -3.01368200 | -2.45647100 |
| C | 3.44802400  | 0.17492400  | 0.74505500  |
| N | 3.58230900  | -0.12612300 | 2.07072400  |
| N | 3.61589100  | -0.40698300 | 3.14531600  |
| C | 3.18339000  | 1.64364100  | 0.60520500  |
| O | 3.03242500  | 2.37181100  | 1.55683300  |
| O | 3.06394500  | 1.98655600  | -0.66638300 |
| C | -2.39087600 | 3.71101000  | -0.47310100 |
| C | -1.93762900 | 2.93814700  | -1.54104200 |
| C | -1.62361700 | 1.59284300  | -1.35237200 |
| C | -1.77335500 | 1.06269900  | -0.07618100 |
| C | -2.22175700 | 1.80712500  | 1.00864100  |
| C | -2.53241400 | 3.14901300  | 0.79470700  |
| H | -2.63552000 | 4.75660900  | -0.62982900 |
| H | -1.82913400 | 3.37584200  | -2.52812200 |
| H | -1.27471000 | 0.98095200  | -2.17704700 |
| H | -2.33161500 | 1.35929800  | 1.99011400  |
| H | -2.88559600 | 3.75183600  | 1.62504300  |

|    |             |             |             |
|----|-------------|-------------|-------------|
| I  | -1.33916600 | -0.98904200 | 0.22307900  |
| Cl | 1.23057700  | -0.45042500 | 0.55281300  |
| C  | 2.68273800  | 3.35460100  | -0.89726700 |
| H  | 3.41235700  | 4.02979400  | -0.44740600 |
| H  | 2.66641500  | 3.46985400  | -1.97911800 |
| H  | 1.69216800  | 3.53688800  | -0.47510700 |
| C  | -4.74630600 | -2.16459300 | 0.16255200  |
| C  | -6.11745000 | -2.36918800 | 0.04794200  |
| C  | -6.91003000 | -1.31480600 | -0.39667400 |
| C  | -6.30308800 | -0.10201800 | -0.70870300 |
| C  | -4.92332900 | 0.00881400  | -0.56214200 |
| N  | -4.16107400 | -1.00126900 | -0.13484100 |
| H  | -7.98379600 | -1.43684600 | -0.49876100 |
| H  | -4.08947300 | -2.96094200 | 0.50644600  |
| H  | -6.54709500 | -3.33174400 | 0.30236300  |
| H  | -6.88103400 | 0.74594200  | -1.05914600 |
| H  | -4.41007500 | 0.93969700  | -0.79450400 |

## 6

E (SMD/M06-2X/BS1) = -1349.17707306 au

G (SMD/M06-2X/BS1) = -1348.895903 au

E (SMD/M06-2X/BS2//SMD/M06-2X/BS1) = -1635.93596499 au

|    |             |             |             |
|----|-------------|-------------|-------------|
| O  | 0.00388600  | 0.47773800  | 0.28558900  |
| Br | -0.00983500 | -1.26833600 | -0.37130000 |
| O  | 2.10277400  | 1.65691600  | -1.05786100 |
| H  | 1.22346800  | 1.31387200  | -0.78668400 |
| H  | 2.61735700  | 1.45075100  | -0.25689000 |
| O  | 2.38925000  | 0.50213600  | 1.53716800  |
| H  | 2.77763500  | -0.34803700 | 1.28226100  |
| H  | 1.46310900  | 0.46885700  | 1.17805600  |
| O  | -2.35814400 | 0.54115400  | 1.57467300  |
| H  | -1.44063200 | 0.49823400  | 1.19315900  |
| H  | -2.77425900 | -0.28745600 | 1.29325500  |
| O  | -2.09835300 | 1.64044900  | -1.07046900 |
| H  | -1.22096700 | 1.29897000  | -0.79140900 |
| H  | -2.61681400 | 1.44945100  | -0.26907500 |

## Phi

E (SMD/M06-2X/BS1) = -242.905483781 au

G (SMD/M06-2X/BS1) = -242.845994 au

E (SMD/M06-2X/BS2//SMD/M06-2X/BS1) = -529.259553873 au

|   |             |             |             |
|---|-------------|-------------|-------------|
| I | -1.55945200 | -0.00001400 | 0.00004200  |
| C | 0.57646800  | 0.00029100  | -0.00029800 |
| C | 1.25541600  | 1.21429100  | -0.00029700 |
| C | 1.25572700  | -1.21433100 | -0.00012100 |

|   |            |             |             |
|---|------------|-------------|-------------|
| C | 2.65035800 | 1.20554900  | 0.00016400  |
| H | 0.71281500 | 2.15304500  | -0.00025700 |
| C | 2.65003000 | -1.20578100 | 0.00001800  |
| H | 0.71326400 | -2.15286000 | -0.00026000 |
| C | 3.34799400 | 0.00008300  | 0.00021800  |
| H | 3.18806900 | 2.14841800  | 0.00007300  |
| H | 3.18767500 | -2.14864200 | -0.00002900 |
| H | 4.43316800 | 0.00017300  | 0.00014100  |

### Et<sub>3</sub>N

E (SMD/M06-2X/BS1) = -292.260941254 au

G (SMD/M06-2X/BS1) = -292.085705 au

E (SMD/M06-2X/BS2//SMD/M06-2X/BS1) = -292.376625288 au

|   |             |             |             |
|---|-------------|-------------|-------------|
| N | 0.51463800  | 0.10153600  | 0.00000000  |
| C | -0.64302700 | 0.99836000  | 0.00000000  |
| H | -0.55799400 | 1.65326500  | 0.87280400  |
| H | -0.55799400 | 1.65326500  | -0.87280400 |
| C | 0.59782000  | -0.74027300 | 1.19287900  |
| H | -0.21076000 | -1.49449700 | 1.21917800  |
| H | 1.53638600  | -1.30266400 | 1.11727100  |
| C | 0.59782000  | -0.74027300 | -1.19287900 |
| H | 1.53638600  | -1.30266400 | -1.11727100 |
| H | -0.21076000 | -1.49449700 | -1.21917800 |
| C | 0.59782000  | 0.04653800  | -2.49697300 |
| H | 0.86251600  | -0.61424700 | -3.32788300 |
| H | -0.38202200 | 0.47981200  | -2.71977900 |
| H | 1.33214100  | 0.85788900  | -2.45549800 |
| C | -2.01950000 | 0.32852400  | 0.00000000  |
| H | -2.16537000 | -0.29879700 | 0.88597200  |
| H | -2.80478200 | 1.09124000  | 0.00000000  |
| H | -2.16537000 | -0.29879700 | -0.88597200 |
| C | 0.59782000  | 0.04653800  | 2.49697300  |
| H | -0.38202200 | 0.47981200  | 2.71977900  |
| H | 0.86251600  | -0.61424700 | 3.32788300  |
| H | 1.33214100  | 0.85788900  | 2.45549800  |

### TS<sub>1-20</sub>

E (SMD/M06-2X/BS1) = -1455.45265847 au

G (SMD/M06-2X/BS1) = -1455.203631 au

E (SMD/M06-2X/BS2//SMD/M06-2X/BS1) = -1742.01226787 au

|   |             |            |             |
|---|-------------|------------|-------------|
| C | -2.56392200 | 3.51228500 | 0.42233300  |
| C | -1.97834300 | 3.07587400 | -0.76427500 |
| C | -1.68337400 | 1.72576800 | -0.94790900 |
| C | -1.98606300 | 0.85271200 | 0.08730000  |
| C | -2.56762200 | 1.25173300 | 1.28219200  |
| C | -2.85866200 | 2.60605600 | 1.43906800  |

|    |             |             |             |
|----|-------------|-------------|-------------|
| H  | -2.79322400 | 4.56465700  | 0.55514400  |
| H  | -1.75270000 | 3.78104800  | -1.55754100 |
| H  | -1.23088600 | 1.37353000  | -1.86861600 |
| H  | -2.79294500 | 0.53697500  | 2.06586400  |
| H  | -3.31485900 | 2.94695600  | 2.36273100  |
| I  | -1.51553900 | -1.21017500 | -0.17336200 |
| Cl | 0.98636800  | -0.61669800 | 0.01913200  |
| Cl | -4.25137200 | -1.62187600 | -0.34441700 |
| N  | 3.46687300  | 0.12566000  | 0.22262500  |
| C  | 4.14103600  | -0.28064100 | -1.00844300 |
| H  | 4.01816400  | -1.36243600 | -1.11318700 |
| H  | 3.60088700  | 0.16847700  | -1.84679000 |
| C  | 3.95931200  | -0.52511400 | 1.43568100  |
| H  | 4.94639300  | -0.11814400 | 1.72038500  |
| H  | 3.26605200  | -0.25091600 | 2.23945500  |
| C  | 3.38284900  | 1.57103100  | 0.42884700  |
| H  | 2.71477300  | 1.72526400  | 1.28439500  |
| H  | 4.36747700  | 1.97814400  | 0.72157500  |
| C  | 2.85102900  | 2.34438500  | -0.76914400 |
| H  | 2.66254800  | 3.38084800  | -0.47393700 |
| H  | 3.56288700  | 2.36185200  | -1.59990200 |
| H  | 1.91048300  | 1.91248100  | -1.12484600 |
| C  | 5.62419300  | 0.08620000  | -1.08651900 |
| H  | 6.19725800  | -0.38579300 | -0.28134100 |
| H  | 6.04198000  | -0.25352900 | -2.03939200 |
| H  | 5.77384900  | 1.16917900  | -1.02099600 |
| C  | 4.04407900  | -2.04142900 | 1.33956000  |
| H  | 4.84806200  | -2.37004100 | 0.67410700  |
| H  | 4.24739200  | -2.45514700 | 2.33170100  |
| H  | 3.09983600  | -2.46115800 | 0.97870900  |

### TS<sub>1-18</sub>

E (SMD/M06-2X/BS1) = -1455.44144917 au

G (SMD/M06-2X/BS1) = -1455.185738 au

E (SMD/M06-2X/BS2//SMD/M06-2X/BS1) = -1741.99755299 au

|   |             |             |             |
|---|-------------|-------------|-------------|
| C | -2.84566400 | 3.03387200  | 0.07477300  |
| C | -2.68231700 | 2.24999100  | 1.21670700  |
| C | -1.99316600 | 1.04127700  | 1.14756200  |
| C | -1.49524800 | 0.65032800  | -0.09034900 |
| C | -1.66654600 | 1.39200400  | -1.25141500 |
| C | -2.34437600 | 2.60700500  | -1.15273900 |
| H | -3.37601700 | 3.97821900  | 0.14189200  |
| H | -3.08601200 | 2.57670400  | 2.16941100  |
| H | -1.86325200 | 0.42517100  | 2.03078500  |
| H | -1.28080300 | 1.04302100  | -2.20365800 |
| H | -2.48487200 | 3.21014500  | -2.04371100 |
| I | -0.41632000 | -1.17885300 | -0.25540600 |



|    |             |             |             |
|----|-------------|-------------|-------------|
| Cl | -2.47547700 | -2.41240100 | 0.73131000  |
| Cl | 1.46987400  | -1.14287200 | -2.47978000 |
| N  | 1.69874600  | 0.59603900  | 0.59943200  |
| C  | 1.40411400  | 2.00539700  | 0.29442000  |
| H  | 0.37637000  | 2.19770100  | 0.61863900  |
| H  | 2.04488900  | 2.65536000  | 0.91245700  |
| C  | 1.49581700  | 0.36423600  | 2.03896000  |
| H  | 0.42098600  | 0.47791600  | 2.22923700  |
| H  | 1.99401500  | 1.16152100  | 2.61356000  |
| C  | 3.02229700  | 0.17282900  | 0.11808100  |
| H  | 3.03013400  | 0.29291900  | -0.96472800 |
| H  | 3.11478500  | -0.90119100 | 0.30137900  |
| C  | 1.56797100  | 2.36820000  | -1.17402600 |
| H  | 1.09396200  | 1.62441000  | -1.82088700 |
| H  | 1.10534200  | 3.34231800  | -1.35940500 |
| H  | 2.62171400  | 2.43865600  | -1.46076500 |
| C  | 4.19928200  | 0.92215100  | 0.74570000  |
| H  | 4.21099400  | 0.83373600  | 1.83700900  |
| H  | 5.13509700  | 0.50237900  | 0.36437700  |
| H  | 4.18372500  | 1.98621900  | 0.48927700  |
| C  | 1.96787300  | -0.98999000 | 2.55135600  |
| H  | 1.56440600  | -1.81701100 | 1.96034000  |
| H  | 3.05825200  | -1.07163600 | 2.55231900  |
| H  | 1.62501700  | -1.11379700 | 3.58278000  |

### TS<sub>19-cl2</sub>

E (SMD/M06-2X/BS1) = -1455.44742513 au

G (SMD/M06-2X/BS1) = -1455.194308 au

E (SMD/M06-2X/BS2//SMD/M06-2X/BS1) = -1742.00242088 au

|    |             |             |             |
|----|-------------|-------------|-------------|
| C  | 0.39552000  | 4.08022600  | -0.28739300 |
| C  | 0.49267100  | 3.46971900  | 0.96207800  |
| C  | 0.45547300  | 2.08088800  | 1.07161200  |
| C  | 0.31786700  | 1.34128700  | -0.09762500 |
| C  | 0.23488600  | 1.91901200  | -1.35848300 |
| C  | 0.27078000  | 3.31056700  | -1.44192300 |
| H  | 0.42414600  | 5.16243000  | -0.36189100 |
| H  | 0.59949100  | 4.07043700  | 1.85934900  |
| H  | 0.53172500  | 1.59629100  | 2.03897900  |
| H  | 0.14847400  | 1.30937700  | -2.25174100 |
| H  | 0.20630500  | 3.78663600  | -2.41479000 |
| I  | 0.22230600  | -0.77469700 | 0.04005100  |
| Cl | 5.53247900  | -1.19088900 | 0.09057500  |
| Cl | 2.79134100  | -0.96558200 | 0.06592900  |
| N  | -2.36356400 | -0.42437000 | -0.00729100 |
| C  | -2.83253700 | -1.75127800 | 0.43988300  |
| H  | -2.39571200 | -2.49537800 | -0.23374400 |
| H  | -2.39985100 | -1.93369500 | 1.42788000  |

|   |             |             |             |
|---|-------------|-------------|-------------|
| C | -2.78480500 | -0.07957200 | -1.38279000 |
| H | -3.85675700 | 0.16769700  | -1.37313900 |
| H | -2.25336700 | 0.84204500  | -1.64513500 |
| C | -2.76481700 | 0.67640900  | 0.89235800  |
| H | -2.27102900 | 1.58024900  | 0.51959300  |
| H | -3.84700500 | 0.84493100  | 0.78677000  |
| C | -2.42220600 | 0.45929000  | 2.35789800  |
| H | -2.60153300 | 1.39110100  | 2.90189600  |
| H | -3.04260000 | -0.31682600 | 2.81504900  |
| H | -1.37116500 | 0.18588800  | 2.49559900  |
| C | -4.34791500 | -1.91318300 | 0.49085600  |
| H | -4.80474200 | -1.76775200 | -0.49293900 |
| H | -4.58811400 | -2.92628400 | 0.82612800  |
| H | -4.80661500 | -1.21001000 | 1.19273900  |
| C | -2.52089200 | -1.15220300 | -2.42826200 |
| H | -3.14814700 | -2.03566900 | -2.27999100 |
| H | -2.75691700 | -0.74147500 | -3.41404000 |
| H | -1.47294400 | -1.46744000 | -2.43806700 |

## 22

E (SMD/M06-2X/BS1) = -568.107488926 au

G (SMD/M06-2X/BS1) = -568.008786 au

E (SMD/M06-2X/BS2//SMD/M06-2X/BS1) = -568.338885070 au

|   |             |             |             |
|---|-------------|-------------|-------------|
| C | -2.79345400 | 0.30105300  | -0.13377600 |
| C | -1.50429500 | 0.84917500  | -0.35084700 |
| N | -0.63560300 | -0.09480300 | 0.04342000  |
| H | -1.20068600 | 1.78648800  | -0.78320200 |
| N | -1.17609800 | -1.18186100 | 0.49827800  |
| O | -2.50355300 | -0.97250700 | 0.39392300  |
| C | 0.79912100  | -0.01294800 | 0.01074100  |
| C | 1.40725600  | 1.20741300  | 0.28282200  |
| C | 1.52634800  | -1.15939100 | -0.29210200 |
| C | 2.79654900  | 1.27595400  | 0.24639500  |
| H | 0.81032400  | 2.07760700  | 0.53498800  |
| C | 2.91447200  | -1.07268900 | -0.31654000 |
| H | 1.01277100  | -2.08856700 | -0.51249600 |
| C | 3.54826600  | 0.14028500  | -0.05054000 |
| H | 3.28967600  | 2.21843000  | 0.45926600  |
| H | 3.49936600  | -1.95507800 | -0.55341100 |
| H | 4.63143400  | 0.20089900  | -0.07552300 |
| O | -3.93726700 | 0.66297600  | -0.29872700 |

## TS<sub>22-23</sub>

E (SMD/M06-2X/BS1) = -1488.38724556 au

G (SMD/M06-2X/BS1) = -1488.292307 au

E (SMD/M06-2X/BS2//SMD/M06-2X/BS1) = -1488.69475670 au

|   |            |            |            |
|---|------------|------------|------------|
| C | 1.42569600 | 2.05779800 | 0.46267400 |
|---|------------|------------|------------|

|    |             |             |             |
|----|-------------|-------------|-------------|
| C  | 0.59461000  | 0.94146500  | 0.86664000  |
| N  | -0.47115700 | 0.99423500  | -0.02676800 |
| H  | 0.39845800  | 0.67091800  | 1.89501600  |
| N  | -0.30325800 | 1.81178700  | -0.98766700 |
| O  | 0.83714100  | 2.46427100  | -0.77184800 |
| C  | -1.66586200 | 0.20024000  | 0.02791200  |
| C  | -2.79909100 | 0.64960800  | -0.64721100 |
| C  | -1.64705500 | -0.98179300 | 0.76191000  |
| C  | -3.94657500 | -0.13081000 | -0.59164900 |
| H  | -2.78417200 | 1.58926800  | -1.18769700 |
| C  | -2.80999900 | -1.74372000 | 0.80823100  |
| H  | -0.75038600 | -1.31396300 | 1.27331900  |
| C  | -3.95354100 | -1.32334000 | 0.13252100  |
| H  | -4.84066400 | 0.20120100  | -1.10798800 |
| H  | -2.81473600 | -2.67056600 | 1.37104400  |
| H  | -4.85603600 | -1.92421400 | 0.17314800  |
| O  | 2.41251300  | 2.58380100  | 0.87365600  |
| Cl | 1.83192000  | -0.73031200 | 0.14383400  |
| Cl | 3.10232100  | -2.48122200 | -0.55891800 |

## 19

E (SMD/M06-2X/BS1) = -1455.45055493 au

G (SMD/M06-2X/BS1) = -1455.197859 au

E (SMD/M06-2X/BS2//SMD/M06-2X/BS1) = -1742.00777213 au

|    |             |             |             |
|----|-------------|-------------|-------------|
| C  | -0.88607900 | 3.92503100  | 0.00000000  |
| C  | -0.73651700 | 3.25146300  | -1.21083200 |
| C  | -0.43111400 | 1.89172000  | -1.22606800 |
| C  | -0.27838300 | 1.25492900  | 0.00006400  |
| C  | -0.43177900 | 1.89163500  | 1.22616000  |
| C  | -0.73718500 | 3.25137400  | 1.21086300  |
| H  | -1.12822500 | 4.98269900  | -0.00003000 |
| H  | -0.86302700 | 3.77704000  | -2.15138700 |
| H  | -0.32200600 | 1.35400300  | -2.16206400 |
| H  | -0.32318000 | 1.35384600  | 2.16217000  |
| H  | -0.86421800 | 3.77687400  | 2.15139200  |
| I  | 0.16964900  | -0.82449800 | 0.00015500  |
| Cl | -7.05782400 | -1.05368900 | -0.00021100 |
| Cl | -2.37998200 | -1.30227100 | 0.00013900  |
| N  | 2.44945900  | -0.29203300 | -0.00008100 |
| C  | 3.09324300  | -1.64134200 | -0.00005200 |
| H  | 2.72405000  | -2.17314400 | 0.88047400  |
| H  | 2.72390100  | -2.17325300 | -0.88045000 |
| C  | 2.79349600  | 0.51763600  | 1.20968700  |
| H  | 3.83769800  | 0.82898200  | 1.09537900  |

|   |            |             |             |
|---|------------|-------------|-------------|
| H | 2.18344300 | 1.42391000  | 1.15652200  |
| C | 2.79338300 | 0.51744800  | -1.21000200 |
| H | 2.18375600 | 1.42399500  | -1.15662000 |
| H | 3.83776400 | 0.82829100  | -1.09604600 |
| C | 2.60036700 | -0.18713600 | -2.54045300 |
| H | 2.77230100 | 0.54491900  | -3.33415900 |
| H | 3.31367400 | -1.00311200 | -2.68228100 |
| H | 1.58756300 | -0.58100300 | -2.66482700 |
| C | 4.61373900 | -1.60070900 | -0.00021400 |
| H | 5.01010400 | -1.10454400 | 0.88972100  |
| H | 4.97894500 | -2.63125300 | -0.00006900 |
| H | 5.00993000 | -1.10485600 | -0.89039600 |
| C | 2.60119000 | -0.18708800 | 2.54016200  |
| H | 3.31503200 | -1.00262300 | 2.68183200  |
| H | 2.77276500 | 0.54504000  | 3.33387700  |
| H | 1.58865000 | -0.58161700 | 2.66466500  |

## 24

E (SMD/M06-2X/BS1) = -1027.66044199 au

G (SMD/M06-2X/BS1) = -1027.573284 au

E (SMD/M06-2X/BS2//SMD/M06-2X/BS1) = -1027.92885155 au

|    |             |             |             |
|----|-------------|-------------|-------------|
| C  | 2.59779500  | -0.37759800 | -0.07770900 |
| C  | 1.38331900  | 0.35054800  | 0.04805000  |
| N  | 0.38723000  | -0.53221900 | -0.13463700 |
| N  | 0.79286700  | -1.74173100 | -0.37825600 |
| O  | 2.14246000  | -1.67016700 | -0.34339600 |
| C  | -1.03261200 | -0.29659200 | -0.08545900 |
| C  | -1.80268800 | -1.11635700 | 0.73108300  |
| C  | -1.57478600 | 0.72076000  | -0.86263700 |
| C  | -3.17670700 | -0.89986400 | 0.76848000  |
| H  | -1.33134800 | -1.89343500 | 1.32304300  |
| C  | -2.94997900 | 0.92356800  | -0.80778100 |
| H  | -0.94202100 | 1.32270900  | -1.50649200 |
| C  | -3.74666300 | 0.11760800  | 0.00492900  |
| H  | -3.79915600 | -1.52487300 | 1.39971400  |
| H  | -3.39783400 | 1.70859800  | -1.40744300 |
| H  | -4.81847900 | 0.28323300  | 0.04168200  |
| O  | 3.77155200  | -0.10338300 | 0.00285200  |
| Cl | 1.20764600  | 1.98102200  | 0.47943300  |

## 23

E (SMD/M06-2X/BS1) = -1488.39229955 au

G (SMD/M06-2X/BS1) = -1488.296797 au

E (SMD/M06-2X/BS2//SMD/M06-2X/BS1) = -1488.69715763 au

|    |             |             |             |
|----|-------------|-------------|-------------|
| C  | -1.64738200 | -2.10049900 | 0.26161700  |
| C  | -0.83886100 | -0.92108300 | 0.73188100  |
| N  | 0.41543300  | -1.17668600 | 0.01514800  |
| H  | -0.66972200 | -0.94722900 | 1.81101500  |
| N  | 0.38425200  | -2.19332600 | -0.71907100 |
| O  | -0.79924000 | -2.79221800 | -0.64192800 |
| C  | 1.57140000  | -0.33622200 | 0.05359900  |
| C  | 2.47133700  | -0.38636100 | -1.01244400 |
| C  | 1.73860100  | 0.50795700  | 1.15030900  |
| C  | 3.58713300  | 0.43503700  | -0.95931700 |
| H  | 2.28834200  | -1.03129500 | -1.86457700 |
| C  | 2.86294000  | 1.32434100  | 1.17583100  |
| H  | 1.02778700  | 0.53205000  | 1.97010500  |
| C  | 3.78217200  | 1.28809400  | 0.12888500  |
| H  | 4.29649800  | 0.42194600  | -1.77933100 |
| H  | 3.01429300  | 1.99222200  | 2.01612500  |
| H  | 4.65185700  | 1.93624900  | 0.15404000  |
| O  | -2.74223700 | -2.46911200 | 0.48937300  |
| Cl | -1.57547200 | 0.63714800  | 0.23595300  |
| Cl | -2.72094400 | 3.12221700  | -0.55016700 |

### TS<sub>1</sub>

E (SMD/M06-2X/BS1) = -1770.60295032 au

G (SMD/M06-2X/BS1) = -1770.406411 au

E (SMD/M06-2X/BS2//SMD/M06-2X/BS1) = -2057.28217426 au

|   |             |             |             |
|---|-------------|-------------|-------------|
| C | 4.38023000  | -2.34440900 | -1.33279400 |
| C | 3.52818400  | -1.81849500 | -0.36987300 |
| C | 3.45577600  | -0.43254700 | -0.18708200 |
| C | 4.24108100  | 0.42283100  | -0.96577200 |
| C | 5.08226400  | -0.11425700 | -1.93601000 |
| C | 5.15438100  | -1.49281300 | -2.12085100 |
| H | 4.43262700  | -3.41893200 | -1.47336100 |
| H | 2.91547800  | -2.48180600 | 0.23486300  |
| H | 4.19923700  | 1.49608000  | -0.82001900 |
| H | 5.68709900  | 0.55057600  | -2.54384200 |
| H | 5.81365000  | -1.90504800 | -2.87801800 |
| C | 2.55931400  | 0.11329600  | 0.87364300  |
| N | 2.87695300  | -0.38013000 | 2.13515600  |
| N | 3.05521200  | -0.83036500 | 3.13082700  |
| C | 2.21329400  | 1.57729600  | 1.03321000  |
| O | 2.14537000  | 2.11381200  | 2.11086400  |
| O | 1.93453000  | 2.11594600  | -0.13725500 |
| C | -2.81471900 | 3.35308900  | -0.87097800 |
| C | -1.80719400 | 2.65903100  | -1.53788600 |

|    |             |             |             |
|----|-------------|-------------|-------------|
| C  | -1.58384000 | 1.30863800  | -1.26816000 |
| C  | -2.39242300 | 0.68581900  | -0.32477400 |
| C  | -3.40812100 | 1.34999000  | 0.35005700  |
| C  | -3.61181500 | 2.69994900  | 0.06703900  |
| H  | -2.98349400 | 4.40319800  | -1.08740800 |
| H  | -1.19246400 | 3.16108400  | -2.27862200 |
| H  | -0.80117400 | 0.76407900  | -1.78595600 |
| H  | -4.03633700 | 0.82718300  | 1.06200700  |
| H  | -4.40116400 | 3.23665800  | 0.58364300  |
| I  | -2.04823200 | -1.37279700 | 0.11858500  |
| Cl | 0.57906800  | -0.67264700 | 0.63393500  |
| Cl | -5.18443200 | -1.64408400 | -0.37476800 |
| C  | 1.48794100  | 3.48489500  | -0.08949000 |
| H  | 2.24941800  | 4.10758900  | 0.38318500  |
| H  | 1.34265200  | 3.77598800  | -1.12752200 |
| H  | 0.55150500  | 3.54758100  | 0.46777000  |

### TS<sub>2-15</sub>

E (SMD/M06-2X/BS1) = -1527.71292772 au

G (SMD/M06-2X/BS1) = -1527.595330 au

E (SMD/M06-2X/BS2//SMD/M06-2X/BS1) = -1528.03940042 au

|    |             |             |             |
|----|-------------|-------------|-------------|
| C  | 3.47753500  | 0.06039400  | -0.97448200 |
| C  | 2.28677400  | 0.63266200  | -0.53480100 |
| C  | 1.36444500  | -0.14638200 | 0.16978500  |
| C  | 1.65127900  | -1.48858900 | 0.44550600  |
| C  | 2.84967700  | -2.04648400 | 0.01653300  |
| C  | 3.76318900  | -1.27479200 | -0.70042500 |
| H  | 4.18709700  | 0.66798600  | -1.52695100 |
| H  | 2.07867900  | 1.67548900  | -0.74236600 |
| H  | 0.93524700  | -2.09786100 | 0.99131900  |
| H  | 3.06410900  | -3.08768600 | 0.23449300  |
| H  | 4.69468400  | -1.71365400 | -1.04349200 |
| C  | 0.08279800  | 0.43396700  | 0.66697200  |
| N  | -0.12262800 | 0.21994100  | 2.00603500  |
| N  | -0.34616500 | -0.02046800 | 3.06609200  |
| C  | -0.48750400 | 1.77380300  | 0.31054900  |
| O  | -1.11963400 | 2.44576000  | 1.09057500  |
| O  | -0.26672100 | 2.06098600  | -0.96178000 |
| C  | -0.86307200 | 3.28605800  | -1.42245100 |
| H  | -1.94800100 | 3.23216800  | -1.31661400 |
| H  | -0.47377000 | 4.13064600  | -0.85122000 |
| H  | -0.58206000 | 3.36701500  | -2.47050500 |
| Cl | -1.60216900 | -0.85079200 | -0.10830000 |
| Cl | -3.24102600 | -2.14969100 | -0.93129100 |

**1**

E (SMD/M06-2X/BS2) = -1449.64631097 au

G (SMD/M06-2X/ BS2) = -1449.592349 au

E (SMD/M06-2X/BS3//SMD/M06-2X/BS2) = -1449.69984567 au

|    |             |             |             |
|----|-------------|-------------|-------------|
| C  | 3.68459600  | -0.00027400 | 0.00001100  |
| C  | 2.99565000  | 0.20680100  | 1.18826800  |
| C  | 1.60709800  | 0.20787600  | 1.20087800  |
| C  | 0.95080700  | -0.00015100 | -0.00000400 |
| C  | 1.60708600  | -0.20825700 | -1.20086700 |
| C  | 2.99564200  | -0.20730100 | -1.18824300 |
| H  | 4.76704100  | -0.00030400 | 0.00000700  |
| H  | 3.53511700  | 0.36677700  | 2.11267300  |
| H  | 1.05761700  | 0.36775300  | 2.11872200  |
| H  | 1.05760600  | -0.36805600 | -2.11872600 |
| H  | 3.53510200  | -0.36731000 | -2.11264700 |
| I  | -1.13892100 | 0.00009800  | -0.00000300 |
| Cl | -1.07710600 | 2.49087400  | -0.10699300 |
| Cl | -1.07789000 | -2.49065000 | 0.10698700  |

**2**

E (SMD/M06-2X/BS2) = -607.682066754 au

G (SMD/M06-2X/ BS2) = -607.561413 au

E (SMD/M06-2X/BS3//SMD/M06-2X/BS2) = -607.730494352 au

|   |             |             |             |
|---|-------------|-------------|-------------|
| C | -3.16366800 | 0.48900300  | 0.43354100  |
| C | -1.86019400 | 0.95908800  | 0.40342100  |
| C | -0.81622400 | 0.14096800  | -0.03995100 |
| C | -1.11297900 | -1.16044700 | -0.45363100 |
| C | -2.41865500 | -1.62707700 | -0.40865400 |
| C | -3.45047100 | -0.80906000 | 0.03218800  |
| H | -3.95597800 | 1.13990800  | 0.78123700  |
| H | -1.65499800 | 1.96962700  | 0.73696700  |
| H | -0.32586600 | -1.80514400 | -0.81506200 |
| H | -2.62915100 | -2.63907800 | -0.73141300 |
| H | -4.46741500 | -1.17843500 | 0.06136600  |
| C | 0.55789100  | 0.66842400  | -0.08905800 |
| N | 0.70107400  | 1.97446200  | -0.17531000 |
| N | 0.82655400  | 3.07744900  | -0.24834800 |
| C | 1.85228800  | -0.00258900 | -0.00070900 |
| O | 2.91359900  | 0.57637300  | -0.07654800 |
| O | 1.73690500  | -1.31573400 | 0.18937400  |
| C | 2.96980700  | -2.03534900 | 0.29794800  |
| H | 3.55541400  | -1.92322500 | -0.61325700 |
| H | 3.54426800  | -1.67523800 | 1.15010200  |

H 2.68953700 -3.07468100 0.44249500

### 3

E (SMD/M06-2X/BS2) = -1418.60647408 au

G (SMD/M06-2X/ BS2) = -1418.492457 au

E (SMD/M06-2X/BS3//SMD/M06-2X/BS2) = -1418.67734136 au

|    |             |             |             |
|----|-------------|-------------|-------------|
| C  | 3.23573700  | 0.95825800  | -0.33205300 |
| C  | 1.85656000  | 1.14527000  | -0.29442700 |
| C  | 1.02261600  | 0.08887700  | 0.03630300  |
| C  | 1.57668500  | -1.15949400 | 0.32688200  |
| C  | 2.94614200  | -1.34188600 | 0.28557100  |
| C  | 3.78310600  | -0.27950500 | -0.04408000 |
| H  | 3.87579700  | 1.79212900  | -0.58993000 |
| H  | 1.45301000  | 2.12001500  | -0.52561100 |
| H  | 0.93341000  | -1.99259900 | 0.58307700  |
| H  | 3.36291500  | -2.31542400 | 0.50931100  |
| H  | 4.85570500  | -0.42243200 | -0.07525200 |
| C  | -0.48868100 | 0.21517900  | 0.11110200  |
| C  | -1.18207400 | -0.74461000 | -0.89831300 |
| O  | -0.52051700 | -1.26661900 | -1.74903100 |
| O  | -2.48593500 | -0.95504500 | -0.86997600 |
| C  | -3.46664500 | -0.42271200 | 0.03304700  |
| H  | -3.53779300 | -1.06213400 | 0.90960100  |
| H  | -3.25355200 | 0.60085000  | 0.32297500  |
| H  | -4.39945700 | -0.45448000 | -0.52411600 |
| Cl | -1.06183300 | 1.85074000  | -0.32271800 |
| Cl | -0.99340700 | -0.15949700 | 1.79317800  |

### 4

E (SMD/M06-2X/BS2) = -1697.92111179 au

G (SMD/M06-2X/ BS2) = -1697.784613 au

E (SMD/M06-2X/BS3//SMD/M06-2X/BS2) = -1697.99653471 au

|   |            |             |             |
|---|------------|-------------|-------------|
| C | 3.64994800 | 2.22400900  | 0.19049000  |
| C | 3.39355800 | 1.54637600  | -0.99498800 |
| C | 2.35250100 | 0.62953900  | -1.06336700 |
| C | 1.59011400 | 0.41039800  | 0.07365800  |
| C | 1.83084400 | 1.07167300  | 1.26766000  |
| C | 2.87257100 | 1.98897500  | 1.31762400  |
| H | 4.46265800 | 2.93760100  | 0.23704600  |
| H | 4.00162600 | 1.73042400  | -1.87127200 |
| H | 2.14546800 | 0.09502000  | -1.98183100 |
| H | 1.22400500 | 0.87651800  | 2.14260800  |
| H | 3.07771500 | 2.51420500  | 2.24153500  |
| I | 0.00399900 | -0.96913200 | -0.01815200 |



|    |             |             |             |
|----|-------------|-------------|-------------|
| Cl | 1.65321400  | -2.81597500 | 0.04276700  |
| C  | -3.00253300 | 3.02189400  | -0.10079000 |
| C  | -2.02108600 | 2.88036900  | -1.07175900 |
| C  | -1.18769700 | 1.78125300  | -1.01776100 |
| C  | -2.26082100 | 0.98266400  | 0.88488400  |
| C  | -3.12409400 | 2.06146900  | 0.89163700  |
| H  | -3.66920300 | 3.87429700  | -0.11975400 |
| H  | -1.89850800 | 3.60472300  | -1.86428300 |
| H  | -0.40183900 | 1.61516500  | -1.74420400 |
| H  | -2.31815000 | 0.18864100  | 1.61690700  |
| H  | -3.87743700 | 2.13530600  | 1.66294300  |
| N  | -1.31796800 | 0.86771200  | -0.05256600 |
| Cl | -2.72923200 | -2.23541400 | -0.11649500 |

## 11

E (SMD/M06-2X/BS2) = -1697.89919422 au

G (SMD/M06-2X/ BS2) = -1697.764337 au

E (SMD/M06-2X/BS3//SMD/M06-2X/BS2) = -1697.97822375 au

|    |             |             |             |
|----|-------------|-------------|-------------|
| C  | -0.81261700 | 3.94557800  | 0.31657100  |
| C  | -0.82636400 | 3.12812700  | 1.43974500  |
| C  | -0.54951700 | 1.77295600  | 1.32120000  |
| C  | -0.26974600 | 1.28105700  | 0.05737000  |
| C  | -0.24699000 | 2.06766800  | -1.08210800 |
| C  | -0.52307800 | 3.42092900  | -0.93659000 |
| H  | -1.02517400 | 5.00182200  | 0.41964100  |
| H  | -1.04584000 | 3.54188800  | 2.41524100  |
| H  | -0.54972000 | 1.12514500  | 2.18765700  |
| H  | -0.01141500 | 1.64732100  | -2.05049800 |
| H  | -0.50885000 | 4.06230200  | -1.80802000 |
| I  | 0.13619600  | -0.75873000 | -0.13986000 |
| Cl | 7.05630200  | -0.77823800 | 0.16440500  |
| Cl | 2.51750500  | -0.31604600 | -0.20674300 |
| C  | -2.67498600 | -1.70611800 | 0.95968200  |
| C  | -4.03723900 | -1.92312700 | 1.04092000  |
| C  | -4.85738100 | -1.39089300 | 0.05724300  |
| C  | -4.29465300 | -0.65955300 | -0.97944600 |
| C  | -2.92548500 | -0.48294700 | -1.00035800 |
| N  | -2.15002300 | -0.99865500 | -0.04347700 |
| H  | -5.92764200 | -1.54619100 | 0.09653700  |
| H  | -1.98135600 | -2.09449700 | 1.69525000  |
| H  | -4.43859100 | -2.49840400 | 1.86302700  |
| H  | -4.90057100 | -0.23158100 | -1.76534600 |
| H  | -2.42544300 | 0.07625400  | -1.78215200 |

## 15

E (SMD/M06-2X/BS2) = -1418.55579946 au

G (SMD/M06-2X/ BS2) = -1418.446952 au

E (SMD/M06-2X/BS3//SMD/M06-2X/BS2) = -1418.63005553 au

|    |             |             |             |
|----|-------------|-------------|-------------|
| C  | 3.63770800  | -0.32062900 | -0.13255100 |
| C  | 2.43843400  | 0.33461100  | -0.01191300 |
| C  | 1.22858300  | -0.41270500 | 0.03930900  |
| C  | 1.27044600  | -1.83201500 | -0.03693600 |
| C  | 2.47802600  | -2.46789200 | -0.15261600 |
| C  | 3.65580100  | -1.71466100 | -0.19953500 |
| H  | 4.56244200  | 0.23735400  | -0.17412200 |
| H  | 2.41356800  | 1.41506000  | 0.04256300  |
| H  | 0.35129400  | -2.40116600 | -0.00075200 |
| H  | 2.52340900  | -3.54644500 | -0.20762000 |
| H  | 4.60578900  | -2.22680700 | -0.29124700 |
| C  | 0.01910600  | 0.26725400  | 0.14729500  |
| C  | -0.03427300 | 1.77134200  | 0.32398800  |
| O  | 0.35101100  | 2.28036000  | 1.33703200  |
| O  | -0.56749800 | 2.35547900  | -0.71702800 |
| C  | -0.73247600 | 3.78760200  | -0.62517800 |
| H  | -1.38411500 | 4.02332400  | 0.21378300  |
| H  | 0.23890500  | 4.26095900  | -0.49686400 |
| H  | -1.18713800 | 4.08398700  | -1.56422300 |
| Cl | -1.47151400 | -0.46822400 | 0.15491400  |
| Cl | -4.06733200 | -1.85003600 | -0.07213400 |

Cl<sub>2</sub>

E (SMD/M06-2X/BS2) = -920.363579598 au

G (SMD/M06-2X/ BS2) = -920.384046 au

E (SMD/M06-2X/BS3//SMD/M06-2X/BS2) = -920.394920557 au

|    |            |            |             |
|----|------------|------------|-------------|
| Cl | 0.00000000 | 0.00000000 | 0.99428900  |
| Cl | 0.00000000 | 0.00000000 | -0.99428900 |

N<sub>2</sub>

E (SMD/M06-2X/BS2) = -109.530764525 au

G (SMD/M06-2X/ BS2) = -109.543410 au

E (SMD/M06-2X/BS3//SMD/M06-2X/BS2) = -109.537982915 au

|   |            |            |             |
|---|------------|------------|-------------|
| N | 0.00000000 | 0.00000000 | 0.54279400  |
| N | 0.00000000 | 0.00000000 | -0.54279400 |

## PhI

E (SMD/M06-2X/BS2) = -529.265994817 au

G (SMD/M06-2X/ BS2) = -529.206910 au

E (SMD/M06-2X/BS3//SMD/M06-2X/BS2) = -529.287101467 au

|   |             |             |             |
|---|-------------|-------------|-------------|
| C | 3.32061300  | 0.00000000  | 0.00003900  |
| C | 2.62467300  | 1.20155700  | 0.00001400  |
| C | 1.23501700  | 1.20941500  | -0.00001600 |
| C | 0.55454300  | 0.00000000  | -0.00001800 |
| C | 1.23501700  | -1.20941500 | -0.00002100 |
| C | 2.62467400  | -1.20155700 | 0.00001400  |
| H | 4.40305800  | 0.00000000  | 0.00007100  |
| H | 3.16099500  | 2.14212700  | 0.00001700  |
| H | 0.69243700  | 2.14500800  | -0.00003100 |
| H | 0.69243800  | -2.14500800 | -0.00003500 |
| H | 3.16099500  | -2.14212700 | 0.00001700  |
| I | -1.54107800 | 0.00000000  | -0.00000200 |

#### Pyridine

E (SMD/M06-2X/BS2) = -248.276758749 au

G (SMD/M06-2X/ BS2) = -248.214603 au

E (SMD/M06-2X/BS3//SMD/M06-2X/BS2) = -248.298189374 au

|   |             |             |             |
|---|-------------|-------------|-------------|
| C | 0.00000100  | 1.37572600  | 0.00000000  |
| C | 1.19257000  | 0.66832400  | -0.00000700 |
| C | 1.13976500  | -0.71844100 | 0.00001200  |
| C | -1.13976500 | -0.71843800 | -0.00001300 |
| C | -1.19256700 | 0.66832900  | 0.00000700  |
| H | 0.00000400  | 2.45864400  | 0.00000000  |
| H | 2.14813600  | 1.17538400  | -0.00002100 |
| H | 2.05500900  | -1.30064400 | -0.00001100 |
| H | -2.05501200 | -1.30063800 | 0.00001300  |
| H | -2.14813400 | 1.17538700  | 0.00002200  |
| N | -0.00000300 | -1.40873400 | 0.00000100  |

#### TS<sub>1-4</sub>

E (SMD/M06-2X/BS2) = -1697.90095193 au

G (SMD/M06-2X/ BS2) = -1697.764854 au

E (SMD/M06-2X/BS3//SMD/M06-2X/BS2) = -1697.97580467 au

|   |            |            |             |
|---|------------|------------|-------------|
| C | 1.07987900 | 3.80890500 | 0.30387200  |
| C | 0.71137100 | 3.21667200 | -0.90113100 |
| C | 0.64256900 | 1.83653500 | -1.00834200 |
| C | 0.96356500 | 1.07950900 | 0.10802900  |
| C | 1.33542100 | 1.63955400 | 1.31712400  |
| C | 1.38919900 | 3.02732300 | 1.40697900  |
| H | 1.12432700 | 4.88775500 | 0.37973000  |
| H | 0.47177100 | 3.83062800 | -1.75968300 |
| H | 0.34127000 | 1.36234300 | -1.93327500 |
| H | 1.57603400 | 1.01729900 | 2.16898900  |
| H | 1.67386500 | 3.48940100 | 2.34328700  |

|    |             |             |             |
|----|-------------|-------------|-------------|
| I  | 0.90973700  | -1.01371100 | -0.02124400 |
| Cl | 3.18886200  | -0.93811500 | -0.91434500 |
| Cl | -0.92249700 | -2.72769500 | 1.19064300  |
| C  | -2.20805900 | 1.04634500  | 0.47471300  |
| C  | -3.54078000 | 1.42042100  | 0.38302700  |
| C  | -4.38585800 | 0.66629600  | -0.41632600 |
| C  | -3.87095200 | -0.43411800 | -1.08617300 |
| C  | -2.53037000 | -0.74318400 | -0.91934300 |
| N  | -1.71758300 | -0.01459600 | -0.15884200 |
| H  | -5.43101600 | 0.93108900  | -0.51533200 |
| H  | -1.51046200 | 1.61842200  | 1.07816100  |
| H  | -3.89855000 | 2.28407100  | 0.92679700  |
| H  | -4.49326300 | -1.04948500 | -1.72144400 |
| H  | -2.09105900 | -1.60941500 | -1.40101700 |

### TS<sub>11</sub>

E (SMD/M06-2X/BS2) = -1697.8988853 au

G (SMD/M06-2X/ BS2) = -1697.763282 au

E (SMD/M06-2X/BS3//SMD/M06-2X/BS2) = -1697.97750711 au

|    |             |             |             |
|----|-------------|-------------|-------------|
| C  | -0.12794100 | 3.89903100  | 0.25659200  |
| C  | -0.60559400 | 3.12145500  | 1.30397800  |
| C  | -0.54460600 | 1.73608500  | 1.23146400  |
| C  | -0.00591100 | 1.17539900  | 0.08629600  |
| C  | 0.47780000  | 1.91982800  | -0.97529400 |
| C  | 0.41333400  | 3.30350200  | -0.87542800 |
| H  | -0.17377200 | 4.97812800  | 0.32549500  |
| H  | -1.01920500 | 3.58858600  | 2.18810400  |
| H  | -0.90435400 | 1.12025500  | 2.04492500  |
| H  | 0.90058100  | 1.44319600  | -1.84974600 |
| H  | 0.78763300  | 3.91170500  | -1.68835100 |
| I  | 0.09389800  | -0.91131600 | -0.04876300 |
| Cl | 6.27497700  | -0.64944900 | 0.01302300  |
| Cl | 2.49949900  | -0.83968200 | 0.02293100  |
| C  | -2.91363100 | -1.42274500 | 0.85604700  |
| C  | -4.29585600 | -1.43418800 | 0.85358400  |
| C  | -4.96573000 | -0.76109500 | -0.15698400 |
| C  | -4.23703100 | -0.09840700 | -1.13488100 |
| C  | -2.85779700 | -0.12915500 | -1.07033400 |
| N  | -2.22683700 | -0.77826400 | -0.08908400 |
| H  | -6.04766400 | -0.75286400 | -0.18335200 |
| H  | -2.33401500 | -1.92880100 | 1.61848600  |
| H  | -4.82773800 | -1.96089300 | 1.63310600  |
| H  | -4.72336500 | 0.43482400  | -1.93929400 |
| H  | -2.23513100 | 0.37041000  | -1.80279100 |

**TS<sub>2-15</sub>**

E (SMD/M06-2X/BS2) = -1528.03953733 au

G (SMD/M06-2X/ BS2) = -1527.922503 au

E (SMD/M06-2X/BS3//SMD/M06-2X/BS2) = -1528.11848006 au

|    |             |             |             |
|----|-------------|-------------|-------------|
| C  | 3.53141500  | -0.01846800 | -0.76476900 |
| C  | 2.34321200  | 0.56184500  | -0.34574800 |
| C  | 1.31946700  | -0.24365200 | 0.14683300  |
| C  | 1.49649400  | -1.62250200 | 0.23851200  |
| C  | 2.69163000  | -2.19274500 | -0.16987300 |
| C  | 3.70735600  | -1.39286700 | -0.67825000 |
| H  | 4.32267600  | 0.60862900  | -1.15454700 |
| H  | 2.21840800  | 1.63476700  | -0.40401000 |
| H  | 0.70004600  | -2.24820300 | 0.62229600  |
| H  | 2.82507400  | -3.26427200 | -0.09863200 |
| H  | 4.63656900  | -1.84125200 | -1.00581100 |
| C  | 0.03363300  | 0.36414600  | 0.61719300  |
| N  | -0.12013400 | 0.22636900  | 1.99785700  |
| N  | -0.29390200 | 0.05299800  | 3.06305900  |
| C  | -0.39517400 | 1.76317500  | 0.25727600  |
| O  | -0.90398600 | 2.51278700  | 1.04700700  |
| O  | -0.19683300 | 1.99250400  | -1.02112600 |
| C  | -0.66251300 | 3.26469000  | -1.50684100 |
| H  | -1.73708300 | 3.34523100  | -1.35304900 |
| H  | -0.14720200 | 4.07090900  | -0.98805000 |
| H  | -0.42428000 | 3.27398200  | -2.56540900 |
| Cl | -1.61624500 | -0.74833700 | -0.05042600 |
| Cl | -3.38860900 | -1.98574700 | -0.85853000 |
